# Supplementary material for: An evolutionarily conserved mechanism for cAMP elicited axonal regeneration involves direct activation of the dual leucine zipper kinase DLK
Source: eLife. 2016 Jun 7;5:e14048. doi: 10.7554/eLife.14048 (PMC4896747; doi:10.7554/eLife.14048)
Supplement: Figure 5—source data 1. — The longest neurite length for 100 WT neurons after replating in four different conditions (DMSO+Vehicle, DMSO+forskolin, PKA inhibitor+Vehicle, PKA inhibitor+forskolin) are shown in Table ‘PKAi’. This table contains data from 4 independent experiments. The longest neurite length for 100 DLK KO neurons after replating in two different conditions (DMSO and forskolin) are shown in Table ‘DLK KO’. The table contains data from 3 independent experiments. DOI: http://dx.doi.org/10.7554/eLife.14048.011 [file elife-14048-fig5-data1.xlsx]

## Sheet: PKAi
VEH + DMSO									VEH + FORSK									PKAi + DMSO									PKAi + FORSK										MEAN NEURITE LENGTH						TOTAL NEURONS
Image	Length (um)	Image	Length (um)	Image	Length (um)	Image	Length (um)		Image	Length (um)	Image	Length (um)	Image	Length (um)	Image	Length (um)		Image	Length (um)	Image	Length (um)	Image	Length (um)	Image	Length (um)		Image	Length (um)	Image	Length (um)	Image	Length (um)	Image	Length (um)		EXPT	VEH + DMSO	VEH + FORSK	PKAi + DMSO	PKAi + FORSK		EXPT	VEH + DMSO	VEH + FORSK	PKAi + DMSO	PKAi + FORSK
050715_E-left_1.29	639.074	070915_dmso+dmso_1.20	402.102	2015-07-23 Forskolin_C_left_2_16	664.318	A_left_2_15	955.941		050715_D-left_2.25	616.629	070915_forsk+dmso_2.12	710.492	2015-07-23 Forskolin_C_right_1_01	887.92	A_right_2_05	718.936		050715_F-left_2.16	555.166	070915_dmso+pkai_1.3	450.153	2015-07-23 Forskolin_B_left_1_10	652.82	B_left_2_03	657.433		050715_C-left_2.25	717.248	070915_forsk+pkai_1.14	414.527	2015-07-23 Forskolin_B_right_2_15	551.717	B_right_1_10	642.743		1	97.9349	152.339	83.9627	96.7108		1	114	103	105	99
050715_E-left_2.10	614.5	070915_dmso+dmso_2.8	355.282	2015-07-23 Forskolin_C_left_1_22	612.05	A_left_1_16	875.644		050715_D-left_2.18	604.027	070915_forsk+dmso_2.28	545.25	2015-07-23 Forskolin_C_right_1_30	886.444	A_right_2_10	695.508		050715_F-left_1.9	520.278	070915_dmso+pkai_1.17	436.709	2015-07-23 Forskolin_B_left_1_09	363.388	B_left_2_13	583.817		050715_C-left_1.19	595.221	070915_forsk+pkai_1.13	408.222	2015-07-23 Forskolin_B_right_1_02	457.173	B_right_1_03	604.993		2	59.2748	109.692	62.1012	73.0453		2	75	79	59	68
050715_E-left_2.36	501.342	070915_dmso+dmso_2.13	318.76	2015-07-23 Forskolin_C_left_1_21	548.915	A_left_2_01	770.432		050715_D-left_1.35	581.891	070915_forsk+dmso_1.30	489.966	2015-07-23 Forskolin_C_right_1_29	717.216	A_right_2_19	695.195		050715_F-left_2.14	459.554	070915_dmso+pkai_1.5	265.958	2015-07-23 Forskolin_B_left_1_03	357.395	B_left_2_03	499.151		050715_C-left_2.20	509.219	070915_forsk+pkai_2.27	327.877	2015-07-23 Forskolin_B_right_2_01	414.595	B_right_1_20	602.568		3	109.448	163.726	82.14	87.823		3	108	118	104	108
050715_E-left_2.29	492.944	070915_dmso+dmso_2.15	301.536	2015-07-23 Forskolin_C_left_2_16	359.438	A_left_1_16	744.093		050715_D-left_1.40	559.853	070915_forsk+dmso_1.26	466.77	2015-07-23 Forskolin_C_right_1_05	709.926	A_right_1_14	679.385		050715_F-left_1.37	394.444	070915_dmso+pkai_2.6	264.31	2015-07-23 Forskolin_B_left_2_15	330.416	B_left_1_12	427.129		050715_C-left_2.13	492.827	070915_forsk+pkai_1.6	311.616	2015-07-23 Forskolin_B_right_2_04	344.133	B_right_1_09	548.219		4	129.364	187.984	86.5713	87.623		4	105	114	104	102
050715_E-left_1.1	476.89	070915_dmso+dmso_1.9	265.242	2015-07-23 Forskolin_C_left_1_17	346.008	A_left_2_16	678.863		050715_D-left_1.30	538.089	070915_forsk+dmso_2.13	461.238	2015-07-23 Forskolin_C_right_2_22	688.147	A_right_2_03	631.001		050715_F-left_2.26	384.295	070915_dmso+pkai_1.1	217.008	2015-07-23 Forskolin_B_left_2_24	319.261	B_left_2_03	388.532		050715_C-left_1.20	491.089	070915_forsk+pkai_2.16	308.023	2015-07-23 Forskolin_B_right_1_14	338.561	B_right_2_01	533.167		AVERAGE	99.0054	153.435	78.6938	86.3005
050715_E-left_2.13	431.3	070915_dmso+dmso_2.23	261.11	2015-07-23 Forskolin_C_left_2_10	341.407	A_left_1_11	621.061		050715_D-left_2.15	530.047	070915_forsk+dmso_2.17	447.833	2015-07-23 Forskolin_C_right_1_16	650.817	A_right_2_14	590.212		050715_F-left_2.30	371.229	070915_dmso+pkai_1.7	184.027	2015-07-23 Forskolin_B_left_2_02	309	B_left_2_02	372.218		050715_C-left_1.31	445.499	070915_forsk+pkai_2.1	279.908	2015-07-23 Forskolin_B_right_2_01	335.459	B_right_1_08	468.238		STDEV	29.4977	32.7324	11.2102	9.80035
050715_E-left_1.32	423.498	070915_dmso+dmso_2.4	229.53	2015-07-23 Forskolin_C_left_2_17	328.916	A_left_2_13	608.292		050715_D-left_1.3	492.177	070915_forsk+dmso_1.20	402.526	2015-07-23 Forskolin_C_right_2_08	635.639	A_right_2_01	584.383		050715_F-left_1.34	367.005	070915_dmso+pkai_2.2	181.481	2015-07-23 Forskolin_B_left_2_16	299.014	B_left_1_04	363.002		050715_C-left_1.27	396.381	070915_forsk+pkai_2.14	278.888	2015-07-23 Forskolin_B_right_2_01	327.522	B_right_1_02	425.734		n	4	4	4	4
050715_E-left_1.10	358.08	070915_dmso+dmso_1.23	178.93	2015-07-23 Forskolin_C_left_2_11	317.019	A_left_1_01	559.849		050715_D-left_1.43	471.321	070915_forsk+dmso_1.9	367.785	2015-07-23 Forskolin_C_right_2_22	608.472	A_right_1_01	570.036		050715_F-left_2.36	351.918	070915_dmso+pkai_2.24	179.652	2015-07-23 Forskolin_B_left_2_20	287.734	B_left_1_05	326.82		050715_C-left_1.2	374.621	070915_forsk+pkai_2.3	243.856	2015-07-23 Forskolin_B_right_1_17	316.766	B_right_2_12	420.897		SEM	14.7488	16.3662	5.6051	4.90018
050715_E-left_1.21	350.158	070915_dmso+dmso_1.24	171.49	2015-07-23 Forskolin_C_left_2_02	298.234	A_left_1_03	541.444		050715_D-left_1.10	459.879	070915_forsk+dmso_1.23	295.441	2015-07-23 Forskolin_C_right_1_06	603.456	A_right_2_07	537.727		050715_F-left_2.18	346.793	070915_dmso+pkai_2.5	179.062	2015-07-23 Forskolin_B_left_2_16	259.131	B_left_2_07	326.209		050715_C-left_1.34	370.202	070915_forsk+pkai_2.15	207.231	2015-07-23 Forskolin_B_right_2_08	312.65	B_right_1_08	314.387
050715_E-left_1.5	330.242	070915_dmso+dmso_2.18	148.129	2015-07-23 Forskolin_C_left_1_20	294.465	A_left_1_02	511.922		050715_D-left_1.41	456.849	070915_forsk+dmso_2.13	291.586	2015-07-23 Forskolin_C_right_2_21	578.128	A_right_2_12	513.631		050715_F-left_2.9	337.909	070915_dmso+pkai_2.10	156.727	2015-07-23 Forskolin_B_left_2_28	252.64	B_left_2_01	313.181		050715_C-left_1.4	368.794	070915_forsk+pkai_1.4	203.438	2015-07-23 Forskolin_B_right_2_21	308.424	B_right_2_03	314.181
050715_E-left_2.30	327.187	070915_dmso+dmso_1.15	134.711	2015-07-23 Forskolin_C_left_1_12	293.379	A_left_2_07	505.53		050715_D-left_2.24	443.733	070915_forsk+dmso_1.27	268.899	2015-07-23 Forskolin_C_right_1_14	574.359	A_right_1_11	494.568		050715_F-left_1.32	317.225	070915_dmso+pkai_1.4	151.649	2015-07-23 Forskolin_B_left_2_23	245.852	B_left_1_04	259.017		050715_C-left_2.13	346.218	070915_forsk+pkai_2.2	176.586	2015-07-23 Forskolin_B_right_2_10	305.083	B_right_1_06	294.429			# of NEURONS						% of NEURONS
050715_E-left_2.23	314.827	070915_dmso+dmso_2.21	133.921	2015-07-23 Forskolin_C_left_1_15	291.074	A_left_2_03	430.654		050715_D-left_2.37	429.547	070915_forsk+dmso_1.29	254.028	2015-07-23 Forskolin_C_right_1_03	545.088	A_right_1_03	493.236		050715_F-left_2.35	268.96	070915_dmso+pkai_1.25	104.759	2015-07-23 Forskolin_B_left_2_09	241.564	B_left_1_01	248.376		050715_C-left_2.32	338.038	070915_forsk+pkai_2.17	170.755	2015-07-23 Forskolin_B_right_1_01	300.413	B_right_2_11	291.574		<50	VEH + DMSO	VEH + FORSK	PKAi + DMSO	PKAi + FORSK		<50	VEH + DMSO	VEH + FORSK	PKAi + DMSO	PKAi + FORSK
050715_E-left_1.3	312.277	070915_dmso+dmso_1.24	123.343	2015-07-23 Forskolin_C_left_1_13	286.263	A_left_1_17	405.212		050715_D-left_2.39	428.262	070915_forsk+dmso_1.27	242.965	2015-07-23 Forskolin_C_right_1_25	501.598	A_right_2_11	485.367		050715_F-left_1.36	264.928	070915_dmso+pkai_1.8	99.5002	2015-07-23 Forskolin_B_left_2_06	225.068	B_left_1_02	247.646		050715_C-left_2.19	330.061	070915_forsk+pkai_1.15	167.929	2015-07-23 Forskolin_B_right_2_19	277.198	B_right_2_13	287.53		1	73	47	71	69		1	64.0351	45.6311	67.619	69.697
050715_E-left_2.10	304.421	070915_dmso+dmso_1.31	115.061	2015-07-23 Forskolin_C_left_1_08	280.315	A_left_1_15	387.274		050715_D-left_2.6	427.626	070915_forsk+dmso_1.31	237.196	2015-07-23 Forskolin_C_right_1_15	499.018	A_right_1_05	472.957		050715_F-left_1.31	255.231	070915_dmso+pkai_2.23	94.7697	2015-07-23 Forskolin_B_left_1_16	216.991	B_left_2_10	240.542		050715_C-left_2.3	323.724	070915_forsk+pkai_1.16	160.973	2015-07-23 Forskolin_B_right_1_16	267.505	B_right_2_10	212.008		2	53	46	43	48		2	70.6667	58.2278	72.8814	70.5882
050715_E-left_2.5	298.262	070915_dmso+dmso_1.1	101.859	2015-07-23 Forskolin_C_left_1_18	272.793	A_left_1_11	356.329		050715_D-left_1.23	420.248	070915_forsk+dmso_2.16	235.801	2015-07-23 Forskolin_C_right_2_18	492.98	A_right_1_01	466.429		050715_F-left_2.28	233.398	070915_dmso+pkai_2.7	70.7504	2015-07-23 Forskolin_B_left_2_18	206.566	B_left_2_03	231.095		050715_C-left_1.38	291.228	070915_forsk+pkai_2.30	145.272	2015-07-23 Forskolin_B_right_1_18	261.853	B_right_2_02	211.846		3	57	65	64	71		3	52.7778	55.0847	61.5385	65.7407
050715_E-left_1.19	268.136	070915_dmso+dmso_1.5	87.6248	2015-07-23 Forskolin_C_left_2_03	259.886	A_left_2_16	352.618		050715_D-left_2.21	399.446	070915_forsk+dmso_2.31	229.96	2015-07-23 Forskolin_C_right_2_23	459.525	A_right_2_14	457.118		050715_F-left_1.23	220.655	070915_dmso+pkai_1.16	55.8167	2015-07-23 Forskolin_B_left_1_01	188.583	B_left_1_14	231.093		050715_C-left_1.25	283.782	070915_forsk+pkai_2.26	104.349	2015-07-23 Forskolin_B_right_2_14	257.879	B_right_2_04	199.462		4	72	54	76	75		4	68.5714	47.3684	73.0769	73.5294
050715_E-left_1.33	252.705	070915_dmso+dmso_2.2	80.7861	2015-07-23 Forskolin_C_left_1_14	229.497	A_left_1_05	341.069		050715_D-left_1.44	382.104	070915_forsk+dmso_2.1	225.415	2015-07-23 Forskolin_C_right_2_09	451.917	A_right_2_18	455.794		050715_F-left_1.13	199.966	070915_dmso+pkai_2.8	37.8161	2015-07-23 Forskolin_B_left_1_17	182.067	B_left_1_13	226.903		050715_C-left_2.33	242.645	070915_forsk+pkai_2.11	103.82	2015-07-23 Forskolin_B_right_2_15	230.668	B_right_2_10	178.166		50-149						50-149
050715_E-left_2.33	236.404	070915_dmso+dmso_1.30	79.9356	2015-07-23 Forskolin_C_left_2_12	220.599	A_left_1_02	282.719		050715_D-left_2.31	369.091	070915_forsk+dmso_1.2	206.67	2015-07-23 Forskolin_C_right_1_27	380.337	A_right_1_04	444.483		050715_F-left_2.15	192.819	070915_dmso+pkai_2.4	33.0533	2015-07-23 Forskolin_B_left_2_22	179.928	B_left_1_09	214.46		050715_C-left_1.2	237.692	070915_forsk+pkai_2.19	94.2421	2015-07-23 Forskolin_B_right_1_10	229.197	B_right_2_07	163.636		1	15	18	12	8		1	13.1579	17.4757	11.4286	8.08081
050715_E-left_2.22	225.712	070915_dmso+dmso_2.17	76.0957	2015-07-23 Forskolin_C_left_2_06	217.152	A_left_1_06	282.555		050715_D-left_1.27	351.837	070915_forsk+dmso_1.30	196.836	2015-07-23 Forskolin_C_right_1_27	362.12	A_right_1_01	441.684		050715_F-left_1.10	180.718	070915_dmso+pkai_2.17	31.7038	2015-07-23 Forskolin_B_left_1_10	163.177	B_left_1_11	213.251		050715_C-left_1.14	220.245	070915_forsk+pkai_2.5	84.8705	2015-07-23 Forskolin_B_right_1_04	225.125	B_right_1_05	158.264		2	13	13	5	6		2	17.3333	16.4557	8.47458	8.82353
050715_E-left_2.34	223.734	070915_dmso+dmso_1.14	72.1838	2015-07-23 Forskolin_C_left_2_19	214.224	A_left_1_09	234.967		050715_D-left_1.21	347.86	070915_forsk+dmso_1.12	184.796	2015-07-23 Forskolin_C_right_2_01	357.323	A_right_2_15	431.234		050715_F-left_1.10	170.078	070915_dmso+pkai_2.6	28.0968	2015-07-23 Forskolin_B_left_1_18	156.088	B_left_1_09	206.348		050715_C-left_2.15	218.504	070915_forsk+pkai_2.22	58.9962	2015-07-23 Forskolin_B_right_2_14	195.93	B_right_1_18	156.364		3	16	14	19	11		3	14.8148	11.8644	18.2692	10.1852
050715_E-left_2.16	218.768	070915_dmso+dmso_2.5	70.7744	2015-07-23 Forskolin_C_left_2_15	209.332	A_left_1_04	234.205		050715_D-left_1.33	330.151	070915_forsk+dmso_1.28	135.656	2015-07-23 Forskolin_C_right_2_11	352.91	A_right_1_14	430.769		050715_F-left_1.19	166.712	070915_dmso+pkai_1.23	27.8675	2015-07-23 Forskolin_B_left_2_19	153.674	B_left_1_10	193.795		050715_C-left_2.40	210.514	070915_forsk+pkai_2.35	46.7145	2015-07-23 Forskolin_B_right_2_11	192.942	B_right_2_03	126.02		4	8	9	6	7		4	7.61905	7.89474	5.76923	6.86275
050715_E-left_2.8	213.707	070915_dmso+dmso_2.26	65.9165	2015-07-23 Forskolin_C_left_1_28	200.614	A_left_2_05	214.333		050715_D-left_2.34	299.566	070915_forsk+dmso_2.18	134.159	2015-07-23 Forskolin_C_right_1_26	352.789	A_right_2_01	413.571		050715_F-left_1.20	164.332	070915_dmso+pkai_2.21	27.1199	2015-07-23 Forskolin_B_left_2_26	147.637	B_left_2_13	190.358		050715_C-left_2.2	202.269	070915_forsk+pkai_2.32	44.7461	2015-07-23 Forskolin_B_right_1_05	192.685	B_right_2_02	108.752		150-249						150-249
050715_E-left_1.20	197.99	070915_dmso+dmso_1.26	44.6861	2015-07-23 Forskolin_C_left_1_09	199.49	A_left_2_07	212.348		050715_D-left_1.39	297.942	070915_forsk+dmso_2.10	132.1	2015-07-23 Forskolin_C_right_1_07	348.677	A_right_1_12	398.835		050715_F-left_2.3	125.607	070915_dmso+pkai_1.12	22.1653	2015-07-23 Forskolin_B_left_1_10	132.258	B_left_2_04	122.927		050715_C-left_2.10	132.74	070915_forsk+pkai_1.23	43.5935	2015-07-23 Forskolin_B_right_1_05	188.8	B_right_2_11	108.614		1	9	8	8	6		1	7.89474	7.76699	7.61905	6.06061
050715_E-left_1.16	176.392	070915_dmso+dmso_1.24	43.2061	2015-07-23 Forskolin_C_left_1_27	191.723	A_left_2_15	163.784		050715_D-left_2.41	295.194	070915_forsk+dmso_1.22	127.815	2015-07-23 Forskolin_C_right_2_10	339.207	A_right_1_08	397.184		050715_F-left_1.26	122.034	070915_dmso+pkai_1.27	19.5973	2015-07-23 Forskolin_B_left_2_29	128.381	B_left_2_14	110.563		050715_C-left_2.6	115.917	070915_forsk+pkai_1.9	41.7515	2015-07-23 Forskolin_B_right_2_11	182.094	B_right_1_02	100.681		2	3	8	7	7		2	4	10.1266	11.8644	10.2941
050715_E-left_2.4	155.14	070915_dmso+dmso_2.3	38.9829	2015-07-23 Forskolin_C_left_1_20	191.231	A_left_1_08	159.561		050715_D-left_2.6	294.627	070915_forsk+dmso_1.18	92.7247	2015-07-23 Forskolin_C_right_2_09	337.016	A_right_2_02	383.66		050715_F-left_2.19	121.84	070915_dmso+pkai_1.11	19.1638	2015-07-23 Forskolin_B_left_1_10	123.324	B_left_1_11	105.354		050715_C-left_2.8	109.794	070915_forsk+pkai_2.29	33.5897	2015-07-23 Forskolin_B_right_1_02	174.921	B_right_1_08	65.5573		3	19	7	11	10		3	17.5926	5.9322	10.5769	9.25926
050715_E-left_1.29	150.584	070915_dmso+dmso_1.7	30.2709	2015-07-23 Forskolin_C_left_2_13	188.921	A_left_2_09	145.14		050715_D-left_1.18	276.188	070915_forsk+dmso_2.22	90.7028	2015-07-23 Forskolin_C_right_2_13	328.724	A_right_1_01	361.997		050715_F-left_2.22	117.171	070915_dmso+pkai_1.6	15.5337	2015-07-23 Forskolin_B_left_1_17	109.765	B_left_1_03	91.556		050715_C-left_2.40	100.811	070915_forsk+pkai_1.6	30.8377	2015-07-23 Forskolin_B_right_2_02	158.235	B_right_1_01	54.8876		4	6	13	11	7		4	5.71429	11.4035	10.5769	6.86275
050715_E-left_1.11	145.849	070915_dmso+dmso_2.6	29.883	2015-07-23 Forskolin_C_left_2_17	188.346	A_left_2_01	110.505		050715_D-left_1.11	275.151	070915_forsk+dmso_2.23	88.0883	2015-07-23 Forskolin_C_right_1_16	314.863	A_right_1_04	358.837		050715_F-left_1.25	91.5182	070915_dmso+pkai_2.25	14.9115	2015-07-23 Forskolin_B_left_1_13	103.952	B_left_2_11	73.8592		050715_C-left_1.24	85.6149	070915_forsk+pkai_2.8	21.7659	2015-07-23 Forskolin_B_right_1_15	123.623	B_right_2_11	53.2778		>250						>250
050715_E-left_1.31	145.629	070915_dmso+dmso_1.28	27.6125	2015-07-23 Forskolin_C_left_2_22	186.47	A_left_1_11	100.944		050715_D-left_1.9	267.092	070915_forsk+dmso_2.4	87.0326	2015-07-23 Forskolin_C_right_2_12	303.787	A_right_2_17	354.537		050715_F-left_2.17	90.6401	070915_dmso+pkai_1.29	14.3212	2015-07-23 Forskolin_B_left_1_05	95.2943	B_left_1_05	63.9967		050715_C-left_2.23	83.0778	070915_forsk+pkai_2.9	21.4892	2015-07-23 Forskolin_B_right_2_13	102.856	B_right_1_20	47.4702		1	17	30	14	16		1	14.9123	29.1262	13.3333	16.1616
050715_E-left_2.36	144.095	070915_dmso+dmso_2.27	20.308	2015-07-23 Forskolin_C_left_1_23	186.249	A_left_1_10	98.4129		050715_D-left_1.25	261.039	070915_forsk+dmso_1.23	87.01	2015-07-23 Forskolin_C_right_1_23	280.265	A_right_1_08	351.931		050715_F-left_1.8	83.3946	070915_dmso+pkai_1.19	13.9988	2015-07-23 Forskolin_B_left_2_21	93.4934	B_left_1_09	48.018		050715_C-left_1.1	78.9671	070915_forsk+pkai_1.20	20.6309	2015-07-23 Forskolin_B_right_1_16	99.2255	B_right_1_09	45.7503		2	6	12	4	7		2	8	15.1899	6.77966	10.2941
050715_E-left_1.34	138.586	070915_dmso+dmso_1.2	18.3392	2015-07-23 Forskolin_C_left_2_20	175.475	A_left_1_09	87.5274		050715_D-left_2.27	257.757	070915_forsk+dmso_2.30	77.3589	2015-07-23 Forskolin_C_right_2_05	266.307	A_right_2_15	340.946		050715_F-left_1.29	68.5412	070915_dmso+pkai_1.18	13.1756	2015-07-23 Forskolin_B_left_1_07	92.4788	B_left_1_03	47.9506		050715_C-left_2.14	56.8793	070915_forsk+pkai_2.9	20.1706	2015-07-23 Forskolin_B_right_1_13	91.6024	B_right_1_13	33.5635		3	16	32	10	16		3	14.8148	27.1186	9.61538	14.8148
050715_E-left_1.28	137.721	070915_dmso+dmso_1.10	16.3509	2015-07-23 Forskolin_C_left_1_19	172.259	A_left_2_04	81.9582		050715_D-left_2.36	248.325	070915_forsk+dmso_2.25	62.8343	2015-07-23 Forskolin_C_right_2_09	258.079	A_right_2_02	307.201		050715_F-left_2.13	59.0382	070915_dmso+pkai_2.19	12.9708	2015-07-23 Forskolin_B_left_2_07	89.5322	B_left_2_08	45.3844		050715_C-left_1.7	44.9499	070915_forsk+pkai_2.31	17.8992	2015-07-23 Forskolin_B_right_2_07	90.6733	B_right_2_05	33.3069		4	19	38	11	13		4	18.0952	33.3333	10.5769	12.7451
050715_E-left_2.19	130.779	070915_dmso+dmso_2.28	16.0198	2015-07-23 Forskolin_C_left_1_26	166.871	A_left_1_09	68.6222		050715_D-left_1.1	230.094	070915_forsk+dmso_2.33	56.3831	2015-07-23 Forskolin_C_right_2_08	251.155	A_right_2_04	299.207		050715_F-left_2.34	56.5634	070915_dmso+pkai_1.22	11.8183	2015-07-23 Forskolin_B_left_1_21	85.6674	B_left_2_13	45.2306		050715_C-left_2.39	36.105	070915_forsk+pkai_1.24	17.331	2015-07-23 Forskolin_B_right_1_06	86.8668	B_right_1_13	27.2754
050715_E-left_1.27	125.421	070915_dmso+dmso_1.21	15.209	2015-07-23 Forskolin_C_left_1_28	154.088	A_left_2_12	55.5173		050715_D-left_1.42	195.173	070915_forsk+dmso_1.13	54.2265	2015-07-23 Forskolin_C_right_2_23	248.187	A_right_2_06	298.078		050715_F-left_1.14	54.5807	070915_dmso+pkai_1.15	11.464	2015-07-23 Forskolin_B_left_1_03	81.1602	B_left_1_12	41.2576		050715_C-left_1.10	35.1896	070915_forsk+pkai_2.34	16.8398	2015-07-23 Forskolin_B_right_1_03	84.4234	B_right_1_09	26.7576
050715_E-left_2.28	124.912	070915_dmso+dmso_2.7	14.0182	2015-07-23 Forskolin_C_left_2_21	151.809	A_left_1_08	48.9107		050715_D-left_1.12	175.326	070915_forsk+dmso_1.4	45.329	2015-07-23 Forskolin_C_right_1_24	224.969	A_right_2_05	297.068		050715_F-left_1.24	51.9772	070915_dmso+pkai_1.26	11.1887	2015-07-23 Forskolin_B_left_2_22	73.7227	B_left_1_07	41.152		050715_C-left_2.36	33.5657	070915_forsk+pkai_2.23	16.0465	2015-07-23 Forskolin_B_right_1_15	78.3264	B_right_2_04	25.1861
050715_E-left_2.18	104.859	070915_dmso+dmso_2.24	13.652	2015-07-23 Forskolin_C_left_1_11	150.21	A_left_2_03	48.361		050715_D-left_2.38	172.349	070915_forsk+dmso_1.16	42.0024	2015-07-23 Forskolin_C_right_2_02	216.369	A_right_2_17	285.206		050715_F-left_2.29	44.8808	070915_dmso+pkai_1.1	11.1232	2015-07-23 Forskolin_B_left_2_14	65.7102	B_left_1_13	34.337		050715_C-left_2.34	28.5391	070915_forsk+pkai_1.8	15.7366	2015-07-23 Forskolin_B_right_1_13	66.481	B_right_2_09	25.1224
050715_E-left_1.34	94.1415	070915_dmso+dmso_1.20	13.5155	2015-07-23 Forskolin_C_left_2_04	128.283	A_left_1_04	45.8149		050715_D-left_2.30	167.513	070915_forsk+dmso_1.8	39.6844	2015-07-23 Forskolin_C_right_2_06	212.997	A_right_1_02	272.835		050715_F-left_2.32	44.2272	070915_dmso+pkai_1.10	11.0697	2015-07-23 Forskolin_B_left_1_20	63.3615	B_left_2_13	32.4069		050715_C-left_1.6	27.9722	070915_forsk+pkai_1.9	15.4673	2015-07-23 Forskolin_B_right_1_14	53.5826	B_right_1_05	23.0758
050715_E-left_2.36	78.1752	070915_dmso+dmso_2.32	13.0008	2015-07-23 Forskolin_C_left_1_24	127.552	A_left_2_14	40.1911		050715_D-left_2.11	166.461	070915_forsk+dmso_1.25	39.1877	2015-07-23 Forskolin_C_right_2_04	196.139	A_right_1_15	267.125		050715_F-left_1.37	40.8831	070915_dmso+pkai_2.22	10.1303	2015-07-23 Forskolin_B_left_2_28	53.5235	B_left_1_01	31.9574		050715_C-left_1.17	24.4288	070915_forsk+pkai_1.12	13.9504	2015-07-23 Forskolin_B_right_2_15	50.9318	B_right_1_04	23.0203
050715_E-left_2.22	70.9934	070915_dmso+dmso_2.14	12.7485	2015-07-23 Forskolin_C_left_2_18	125.716	A_left_1_14	35.0405		050715_D-left_1.31	150.027	070915_forsk+dmso_1.32	36.9689	2015-07-23 Forskolin_C_right_1_29	187.901	A_right_2_04	262.378		050715_F-left_2.7	40.7212	070915_dmso+pkai_1.20	10.02	2015-07-23 Forskolin_B_left_1_17	52.8273	B_left_2_04	29.4421		050715_C-left_2.38	23.6563	070915_forsk+pkai_1.2	11.893	2015-07-23 Forskolin_B_right_1_05	48.6386	B_right_2_12	22.9375
050715_E-left_1.8	67.4035	070915_dmso+dmso_1.25	12.7416	2015-07-23 Forskolin_C_left_2_14	124.412	A_left_1_07	34.641		050715_D-left_1.8	118.632	070915_forsk+dmso_1.4	30.4872	2015-07-23 Forskolin_C_right_2_04	172.867	A_right_1_13	247.428		050715_F-left_1.13	36.2831	070915_dmso+pkai_2.20	9.96515	2015-07-23 Forskolin_B_left_1_22	51.607	B_left_2_10	27.1462		050715_C-left_1.23	17.9149	070915_forsk+pkai_2.7	11.7574	2015-07-23 Forskolin_B_right_1_08	42.7272	B_right_2_13	22.8701
050715_E-left_2.17	62.3782	070915_dmso+dmso_1.27	12.2661	2015-07-23 Forskolin_C_left_1_28	117.971	A_left_2_16	34.1614		050715_D-left_2.5	107.087	070915_forsk+dmso_2.7	29.3761	2015-07-23 Forskolin_C_right_2_07	142.232	A_right_1_14	245.816		050715_F-left_2.33	35.9625	070915_dmso+pkai_1.3	9.65292	2015-07-23 Forskolin_B_left_1_03	50.8936	B_left_2_08	27.0434		050715_C-left_2.5	17.8646	070915_forsk+pkai_1.10	11.7209	2015-07-23 Forskolin_B_right_1_03	42.6826	B_right_1_02	22.7373
050715_E-left_1.34	60.0418	070915_dmso+dmso_2.10	11.4733	2015-07-23 Forskolin_C_left_1_21	94.2196	A_left_2_11	29.5768		050715_D-left_1.16	103.949	070915_forsk+dmso_1.11	26.8432	2015-07-23 Forskolin_C_right_1_28	139.948	A_right_1_03	238.066		050715_F-left_1.14	35.7923	070915_dmso+pkai_2.16	9.64185	2015-07-23 Forskolin_B_left_1_21	49.6596	B_left_1_07	26.9551		050715_C-left_2.7	15.369	070915_forsk+pkai_2.6	10.8834	2015-07-23 Forskolin_B_right_2_22	37.0452	B_right_2_02	22.4097
050715_E-left_2.35	49.8193	070915_dmso+dmso_1.33	11.2551	2015-07-23 Forskolin_C_left_2_01	90.3139	A_left_1_13	29.0654		050715_D-left_1.5	103.164	070915_forsk+dmso_2.19	26.7593	2015-07-23 Forskolin_C_right_2_17	137.319	A_right_2_03	230.308		050715_F-left_1.21	35.1596	070915_dmso+pkai_2.22	9.58696	2015-07-23 Forskolin_B_left_2_10	47.2272	B_left_1_05	26.2271		050715_C-left_1.36	15.0287	070915_forsk+pkai_2.20	10.7349	2015-07-23 Forskolin_B_right_1_14	33.9148	B_right_2_13	22.3578
050715_E-left_2.27	48.5538	070915_dmso+dmso_2.25	11.1029	2015-07-23 Forskolin_C_left_2_17	86.5519	A_left_1_14	26.4992		050715_D-left_1.7	102.101	070915_forsk+dmso_2.3	25.1377	2015-07-23 Forskolin_C_right_2_11	131.443	A_right_1_10	227.375		050715_F-left_1.22	33.9314	070915_dmso+pkai_2.12	9.30794	2015-07-23 Forskolin_B_left_2_28	43.8311	B_left_1_08	25.9796		050715_C-left_1.30	14.8954	070915_forsk+pkai_1.5	10.656	2015-07-23 Forskolin_B_right_1_12	32.3041	B_right_2_06	21.6489
050715_E-left_1.9	47.7056	070915_dmso+dmso_1.18	11.0038	2015-07-23 Forskolin_C_left_2_06	79.0672	A_left_2_13	26.1243		050715_D-left_2.3	90.0908	070915_forsk+dmso_1.24	23.2703	2015-07-23 Forskolin_C_right_2_02	127.122	A_right_1_12	227.12		050715_F-left_2.28	33.384	070915_dmso+pkai_2.1	8.95097	2015-07-23 Forskolin_B_left_2_11	43.3014	B_left_1_06	25.8495		050715_C-left_1.38	14.728	070915_forsk+pkai_1.22	10.5227	2015-07-23 Forskolin_B_right_1_03	31.3431	B_right_2_07	21.3395
050715_E-left_1.30	41.7298	070915_dmso+dmso_2.11	10.9125	2015-07-23 Forskolin_C_left_2_07	76.7421	A_left_1_06	24.7029		050715_D-left_2.5	89.215	070915_forsk+dmso_1.19	18.6777	2015-07-23 Forskolin_C_right_1_28	113.512	A_right_2_18	214.717		050715_F-left_1.2	32.9878	070915_dmso+pkai_1.2	8.80431	2015-07-23 Forskolin_B_left_2_09	42.5234	B_left_2_13	24.4444		050715_C-left_2.26	12.1337	070915_forsk+pkai_2.2	10.4356	2015-07-23 Forskolin_B_right_2_03	27.6704	B_right_1_16	20.9509
050715_E-left_2.16	39.981	070915_dmso+dmso_1.29	10.6602	2015-07-23 Forskolin_C_left_1_07	75.5928	A_left_1_11	24.3152		050715_D-left_1.20	79.4136	070915_forsk+dmso_1.15	15.2491	2015-07-23 Forskolin_C_right_2_14	104.852	A_right_1_02	214.644		050715_F-left_2.8	32.3126	070915_dmso+pkai_1.28	8.69777	2015-07-23 Forskolin_B_left_1_09	39.9144	B_left_1_04	22.1567		050715_C-left_2.8	12.0968	070915_forsk+pkai_1.1	10.1681	2015-07-23 Forskolin_B_right_1_14	25.1615	B_right_1_11	20.9309
050715_E-left_1.33	39.6789	070915_dmso+dmso_1.22	10.1722	2015-07-23 Forskolin_C_left_2_17	72.7409	A_left_2_13	24.2861		050715_D-left_1.22	74.4142	070915_forsk+dmso_2.15	13.4394	2015-07-23 Forskolin_C_right_2_14	101.683	A_right_2_19	180.669		050715_F-left_2.14	26.1039	070915_dmso+pkai_2.14	8.47916	2015-07-23 Forskolin_B_left_2_03	38.2755	B_left_1_13	21.4378		050715_C-left_2.35	12.0844	070915_forsk+pkai_2.18	10.008	2015-07-23 Forskolin_B_right_2_18	22.8519	B_right_2_12	20.5023		TOTAL						TOTAL
050715_E-left_1.18	34.6933	070915_dmso+dmso_2.33	9.75669	2015-07-23 Forskolin_C_left_1_12	68.0043	A_left_2_03	23.8438		050715_D-left_2.10	73.9244	070915_forsk+dmso_2.24	12.0355	2015-07-23 Forskolin_C_right_1_21	75.6201	A_right_1_02	179.574		050715_F-left_1.17	26.0375	070915_dmso+pkai_1.13	8.32743	2015-07-23 Forskolin_B_left_2_15	34.9831	B_left_2_02	21.3613		050715_C-left_2.8	11.9589	070915_forsk+pkai_2.21	9.91672	2015-07-23 Forskolin_B_right_2_08	21.9974	B_right_2_05	20.2848		1	114	103	105	99		1	100	100	100	100
050715_E-left_2.23	33.2479	070915_dmso+dmso_1.23	9.30379	2015-07-23 Forskolin_C_left_2_08	65.3243	A_left_2_13	23.7592		050715_D-left_1.18	72.6178	070915_forsk+dmso_2.20	11.9783	2015-07-23 Forskolin_C_right_1_22	64.9531	A_right_1_05	166.515		050715_F-left_2.14	23.0881	070915_dmso+pkai_2.13	8.25779	2015-07-23 Forskolin_B_left_2_04	32.4315	B_left_2_08	21.3049		050715_C-left_2.18	11.6642	070915_forsk+pkai_2.4	9.91396	2015-07-23 Forskolin_B_right_2_16	21.4906	B_right_2_08	20.2575		2	75	79	59	68		2	100	100	100	100
050715_E-left_1.20	32.1461	070915_dmso+dmso_1.19	9.18757	2015-07-23 Forskolin_C_left_2_13	59.5522	A_left_2_11	23.6964		050715_D-left_2.23	62.3386	070915_forsk+dmso_1.1	11.7611	2015-07-23 Forskolin_C_right_2_05	56.3645	A_right_1_08	163.544		050715_F-left_1.6	21.2157	070915_dmso+pkai_2.15	7.79705	2015-07-23 Forskolin_B_left_1_01	27.0971	B_left_2_02	20.6734		050715_C-left_1.3	11.0208	070915_forsk+pkai_1.3	9.86368	2015-07-23 Forskolin_B_right_1_03	21.436	B_right_1_15	20.242		3	108	118	104	108		3	100	100	100	100
050715_E-left_2.24	29.5108	070915_dmso+dmso_1.32	8.9542	2015-07-23 Forskolin_C_left_1_15	57.0679	A_left_1_11	23.1513		050715_D-left_2.22	61.1856	070915_forsk+dmso_1.31	11.4322	2015-07-23 Forskolin_C_right_1_11	56.0278	A_right_1_03	158.135		050715_F-left_1.22	19.0148	070915_dmso+pkai_2.3	7.67252	2015-07-23 Forskolin_B_left_1_07	26.1498	B_left_2_09	20.4604		050715_C-left_1.23	10.8151	070915_forsk+pkai_1.18	9.42601	2015-07-23 Forskolin_B_right_2_17	21.3313	B_right_2_02	20.0792		4	105	114	104	102		4	100	100	100	100
050715_E-left_1.23	28.3025	070915_dmso+dmso_1.3	8.68163	2015-07-23 Forskolin_C_left_2_14	40.2174	A_left_2_02	23.0558		050715_D-left_1.6	60.5952	070915_forsk+dmso_2.21	10.8557	2015-07-23 Forskolin_C_right_1_02	54.7083	A_right_2_17	124.277		050715_F-left_2.15	18.8082	070915_dmso+pkai_2.11	7.47882	2015-07-23 Forskolin_B_left_2_22	25.3253	B_left_2_14	20.1547		050715_C-left_2.11	10.7603	070915_forsk+pkai_2.17	9.16727	2015-07-23 Forskolin_B_right_2_12	21.2813	B_right_1_07	19.8271
050715_E-left_2.35	27.0005	070915_dmso+dmso_2.19	8.60553	2015-07-23 Forskolin_C_left_1_28	38.2409	A_left_2_04	22.7518		050715_D-left_2.32	56.1179	070915_forsk+dmso_2.26	10.7413	2015-07-23 Forskolin_C_right_1_12	50.7216	A_right_1_15	118.153		050715_F-left_1.12	15.7075	070915_dmso+pkai_1.24	6.96366	2015-07-23 Forskolin_B_left_1_03	25.207	B_left_2_11	20.1419		050715_C-left_2.11	10.65	070915_forsk+pkai_1.19	9.11377	2015-07-23 Forskolin_B_right_1_11	21.1666	B_right_1_12	19.7206
050715_E-left_2.8	24.4616	070915_dmso+dmso_2.22	8.59954	2015-07-23 Forskolin_C_left_2_15	37.2563	A_left_2_13	21.7372		050715_D-left_2.2	55.8707	070915_forsk+dmso_1.7	10.5472	2015-07-23 Forskolin_C_right_1_04	46.7786	A_right_2_02	103.019		050715_F-left_1.12	15.4433	070915_dmso+pkai_1.9	6.73675	2015-07-23 Forskolin_B_left_2_08	24.8812	B_left_2_09	20.0682		050715_C-left_1.1	10.4775	070915_forsk+pkai_1.8	8.77756	2015-07-23 Forskolin_B_right_2_08	20.8062	B_right_2_03	19.5268
050715_E-left_1.23	23.4128	070915_dmso+dmso_1.8	8.25779	2015-07-23 Forskolin_C_left_1_20	36.9788	A_left_1_06	21.2703		050715_D-left_2.16	55.6973	070915_forsk+dmso_2.2	10.3908	2015-07-23 Forskolin_C_right_2_12	42.4861	A_right_2_08	92.6362		050715_F-left_1.15	15.0895	070915_dmso+pkai_1.21	6.65834	2015-07-23 Forskolin_B_left_2_25	23.0894	B_left_2_11	20.0073		050715_C-left_2.39	10.3456	070915_forsk+pkai_2.10	8.57786	2015-07-23 Forskolin_B_right_2_16	20.0073	B_right_2_05	19.4767
050715_E-left_2.7	22.9581	070915_dmso+dmso_2.17	8.25779	2015-07-23 Forskolin_C_left_2_17	32.7345	A_left_1_17	21.2703		050715_D-left_2.29	54.239	070915_forsk+dmso_2.25	10.1681	2015-07-23 Forskolin_C_right_1_30	41.2621	A_right_1_10	85.8512		050715_F-left_1.4	14.5532	070915_dmso+pkai_1.29	5.9504	2015-07-23 Forskolin_B_left_2_02	22.4024	B_left_1_08	19.8025		050715_C-left_2.22	10.3	070915_forsk+pkai_2.33	8.44596	2015-07-23 Forskolin_B_right_1_06	19.9345	B_right_2_11	19.3148
050715_E-left_2.20	22.1002	070915_dmso+dmso_1.6	7.64992	2015-07-23 Forskolin_C_left_2_08	32.0666	A_left_2_16	21.2549		050715_D-left_2.1	48.2789	070915_forsk+dmso_2.9	10.0943	2015-07-23 Forskolin_C_right_2_09	41.1875	A_right_1_05	80.7652		050715_F-left_1.12	13.4444	070915_dmso+pkai_2.18	5.30472	2015-07-23 Forskolin_B_left_1_09	22.2222	B_left_1_11	19.747		050715_C-left_1.2	10.133	070915_forsk+pkai_2.25	8.31267	2015-07-23 Forskolin_B_right_1_04	19.6733	B_right_2_05	19.1719
050715_E-left_2.20	20.3541	070915_dmso+dmso_1.11	7.64992	2015-07-23 Forskolin_C_left_1_10	24.297	A_left_1_17	20.7771		050715_D-left_2.8	37.062	070915_forsk+dmso_2.5	9.69857	2015-07-23 Forskolin_C_right_2_20	32.3887	A_right_1_02	58.4684		050715_F-left_2.4	12.7356	070915_dmso+pkai_1.14	5.28443	2015-07-23 Forskolin_B_left_2_05	21.8855	B_left_1_07	19.7461		050715_C-left_1.22	10.008	070915_forsk+pkai_2.28	7.64992	2015-07-23 Forskolin_B_right_2_13	18.696	B_right_2_07	18.3383
050715_E-left_2.21	15.6218	070915_dmso+dmso_1.16	7.52448	2015-07-23 Forskolin_C_left_2_17	23.3943	A_left_2_05	20.7626		050715_D-left_2.8	35.1873	070915_forsk+dmso_2.6	9.62478	2015-07-23 Forskolin_C_right_2_10	29.9008	A_right_2_13	57.8878		050715_F-left_1.18	12.6918	070915_dmso+pkai_2.23	3.80997	2015-07-23 Forskolin_B_left_2_23	21.8318	B_left_1_05	19.525		050715_C-left_1.10	9.97898	070915_forsk+pkai_1.21	7.57613	2015-07-23 Forskolin_B_right_1_13	18.5604	B_right_1_20	17.8515
050715_E-left_1.14	15.0614	070915_dmso+dmso_2.31	7.52448	2015-07-23 Forskolin_C_left_1_02	23.3706	A_left_2_13	20.5505		050715_D-left_1.11	34.7136	070915_forsk+dmso_2.13	9.27565	2015-07-23 Forskolin_C_right_1_09	28.7478	A_right_2_11	56.2544		050715_F-left_1.27	12.4247			2015-07-23 Forskolin_B_left_2_27	21.3695	B_left_2_12	19.4886		050715_C-left_1.11	9.94393	070915_forsk+pkai_1.11	7.53278	2015-07-23 Forskolin_B_right_2_16	18.2983	B_right_1_12	17.0097
050715_E-left_1.8	15.0416	070915_dmso+dmso_2.11	7.51894	2015-07-23 Forskolin_C_left_2_09	23.0303	A_left_1_07	20.323		050715_D-left_1.32	33.4324	070915_forsk+dmso_2.8	8.87487	2015-07-23 Forskolin_C_right_1_11	24.9522	A_right_2_12	47.3892		050715_F-left_2.6	11.387			2015-07-23 Forskolin_B_left_2_12	20.4149	B_left_1_13	19.3038		050715_C-left_2.1	9.89551	070915_forsk+pkai_1.20	7.44423	2015-07-23 Forskolin_B_right_2_21	18.1026	B_right_2_09	16.9488
050715_E-left_2.32	14.5661	070915_dmso+dmso_1.17	7.3935	2015-07-23 Forskolin_C_left_1_09	22.3623	A_left_1_08	19.9827		050715_D-left_1.22	31.2634	070915_forsk+dmso_2.9	8.82322	2015-07-23 Forskolin_C_right_2_08	24.5172	A_right_2_03	41.6043		050715_F-left_2.13	11.3575			2015-07-23 Forskolin_B_left_1_09	20.323	B_left_1_03	19.1364		050715_C-left_1.27	9.75669	070915_forsk+pkai_2.12	7.15506	2015-07-23 Forskolin_B_right_1_08	17.9279	B_right_2_08	16.6648
050715_E-left_2.3	14.4425	070915_dmso+dmso_2.6	7.22516	2015-07-23 Forskolin_C_left_2_07	21.1939	A_left_1_12	19.6342		050715_D-left_1.26	30.0878	070915_forsk+dmso_2.11	8.47224	2015-07-23 Forskolin_C_right_1_28	23.9467	A_right_2_02	36.0788		050715_F-left_2.16	11.132			2015-07-23 Forskolin_B_left_1_12	20.2675	B_left_1_09	19.1364		050715_C-left_1.15	9.7387	070915_forsk+pkai_1.7	6.95213	2015-07-23 Forskolin_B_right_2_11	17.1708	B_right_2_11	16.2908
050715_E-left_1.13	14.1616	070915_dmso+dmso_2.1	7.18688	2015-07-23 Forskolin_C_left_1_23	21.1675	A_left_2_13	19.4758		050715_D-left_1.28	27.6282	070915_forsk+dmso_1.1	8.37816	2015-07-23 Forskolin_C_right_2_18	23.8648	A_right_2_11	32.1366		050715_F-left_1.30	11.0494			2015-07-23 Forskolin_B_left_2_20	20.1419	B_left_2_09	18.6359		050715_C-left_1.5	9.36098	070915_forsk+pkai_2.13	6.74643	2015-07-23 Forskolin_B_right_1_10	16.8113	B_right_2_12	15.7976
050715_E-left_2.15	12.5124	070915_dmso+dmso_2.20	7.18688	2015-07-23 Forskolin_C_left_2_16	20.6734	A_left_1_17	19.3967		050715_D-left_2.20	17.3679	070915_forsk+dmso_2.14	7.20348	2015-07-23 Forskolin_C_right_2_05	23.1486	A_right_2_06	29.7397		050715_F-left_1.7	10.6196			2015-07-23 Forskolin_B_left_2_25	20.0628	B_left_2_07	17.5676		050715_C-left_2.20	9.35267	070915_forsk+pkai_2.31	6.63021	2015-07-23 Forskolin_B_right_2_06	16.5738	B_right_1_08	15.733
050715_E-left_2.25	12.053	070915_dmso+dmso_1.4	6.92215	2015-07-23 Forskolin_C_left_2_05	20.1647	A_left_2_07	19.0408		050715_D-left_1.24	15.1237	070915_forsk+dmso_1.5	7.1034	2015-07-23 Forskolin_C_right_2_03	22.1075	A_right_2_12	27.523		050715_F-left_1.28	10.5292			2015-07-23 Forskolin_B_left_1_07	20.0455	B_left_2_05	17.4092		050715_C-left_1.8	8.88087	070915_forsk+pkai_2.24	6.59332	2015-07-23 Forskolin_B_right_2_17	16.4282	B_right_1_19	15.4436
050715_E-left_2.23	11.4322	070915_dmso+dmso_2.30	6.73675	2015-07-23 Forskolin_C_left_2_02	19.8353	A_left_1_13	18.4703		050715_D-left_1.38	13.6238	070915_forsk+dmso_2.32	7.09556	2015-07-23 Forskolin_C_right_2_12	21.3477	A_right_2_14	25.9969		050715_F-left_1.35	10.4775			2015-07-23 Forskolin_B_left_2_28	20.0246	B_left_1_10	17.3892		050715_C-left_1.29	8.85089	070915_forsk+pkai_1.25	6.32075	2015-07-23 Forskolin_B_right_1_07	16.1252	B_right_1_16	15.2152
050715_E-left_2.6	11.1112	070915_dmso+dmso_2.16	6.59839	2015-07-23 Forskolin_C_left_1_18	19.4867	A_left_1_08	18.0799		050715_D-left_1.22	12.5645	070915_forsk+dmso_1.6	6.99779	2015-07-23 Forskolin_C_right_2_15	21.3313	A_right_2_03	25.4891		050715_F-left_1.32	10.1921			2015-07-23 Forskolin_B_left_2_22	18.4867	B_left_1_02	17.1617		050715_C-left_2.27	8.82322	070915_forsk+pkai_1.17	6.24603	2015-07-23 Forskolin_B_right_2_01	15.773	B_right_2_05	15.1069
050715_E-left_2.25	10.3484	070915_dmso+dmso_2.12	6.25387	2015-07-23 Forskolin_C_left_2_10	19.3066	A_left_2_09	18.0417		050715_D-left_2.28	12.3735	070915_forsk+dmso_1.21	6.9014	2015-07-23 Forskolin_C_right_1_17	21.1539	A_right_2_19	23.7028		050715_F-left_1.37	9.87706			2015-07-23 Forskolin_B_left_2_24	18.3747	B_left_1_11	16.3809		050715_C-left_1.23	8.77756			2015-07-23 Forskolin_B_right_2_17	15.773	B_right_1_13	15.0223
050715_E-left_2.34	10.235	070915_dmso+dmso_1.13	5.84387	2015-07-23 Forskolin_C_left_2_17	19.0463	A_left_2_02	17.8997		050715_D-left_2.8	12.1821	070915_forsk+dmso_2.29	6.69109	2015-07-23 Forskolin_C_right_1_29	20.2411	A_right_1_09	23.518		050715_F-left_2.32	9.62478			2015-07-23 Forskolin_B_left_1_11	18.2501	B_left_1_04	15.875		050715_C-left_2.41	8.70238			2015-07-23 Forskolin_B_right_1_06	15.5128	B_right_1_08	14.9941
050715_E-left_1.22	10.2064	070915_dmso+dmso_2.34	5.44539	2015-07-23 Forskolin_C_left_2_06	18.7078	A_left_1_03	17.7223		050715_D-left_2.14	11.4498	070915_forsk+dmso_1.10	6.56887	2015-07-23 Forskolin_C_right_2_17	20.0646	A_right_2_09	23.0894		050715_F-left_2.21	9.60726			2015-07-23 Forskolin_B_left_1_14	17.6676	B_left_2_09	15.5164		050715_C-left_2.12	8.64519			2015-07-23 Forskolin_B_right_2_07	15.0942	B_right_1_14	14.8357
050715_E-left_1.17	10.1141	070915_dmso+dmso_2.33	5.25076	2015-07-23 Forskolin_C_left_1_25	18.4703	A_left_2_12	17.462		050715_D-left_2.13	11.3095	070915_forsk+dmso_2.23	6.27509	2015-07-23 Forskolin_C_right_1_08	19.9945	A_right_2_19	21.6989		050715_F-left_1.35	9.44722			2015-07-23 Forskolin_B_left_1_21	17.6185	B_left_1_05	15.3271		050715_C-left_1.12	8.61891			2015-07-23 Forskolin_B_right_2_06	14.8467	B_right_1_19	14.7729
050715_E-left_1.34	10.0943	070915_dmso+dmso_1.12	4.78956	2015-07-23 Forskolin_C_left_1_05	18.0699	A_left_2_02	17.3719		050715_D-left_1.15	10.5758	070915_forsk+dmso_1.17	6.25618	2015-07-23 Forskolin_C_right_1_18	19.8271	A_right_2_18	21.0683		050715_F-left_1.29	9.3928			2015-07-23 Forskolin_B_left_1_15	17.1207	B_left_1_02	15.2025		050715_C-left_2.24	8.47916			2015-07-23 Forskolin_B_right_2_20	14.5864	B_right_2_13	14.7729
050715_E-left_1.9	9.67044	070915_dmso+dmso_2.29	4.25319	2015-07-23 Forskolin_C_left_2_19	18.0225	A_left_2_13	17.2372		050715_D-left_2.12	10.169	070915_forsk+dmso_1.3	6.21882	2015-07-23 Forskolin_C_right_1_15	19.5887	A_right_2_03	20.8945		050715_F-left_2.2	9.23737			2015-07-23 Forskolin_B_left_2_19	16.8887	B_left_1_09	15.1624		050715_C-left_2.9	8.39292			2015-07-23 Forskolin_B_right_2_05	14.4408	B_right_2_05	14.6883
050715_E-left_1.26	9.44491	070915_dmso+dmso_2.9	3.33724	2015-07-23 Forskolin_C_left_2_10	17.8679	A_left_1_04	17.1289		050715_D-left_1.37	9.68704	070915_forsk+dmso_2.1	5.87246	2015-07-23 Forskolin_C_right_1_13	18.968	A_right_2_03	20.5023		050715_F-left_2.24	9.18849			2015-07-23 Forskolin_B_left_2_19	15.6829	B_left_2_10	15.1624		050715_C-left_2.32	8.25779			2015-07-23 Forskolin_B_right_2_05	14.2524	B_right_2_05	14.4599
050715_E-left_2.35	9.40664			2015-07-23 Forskolin_C_left_1_16	17.7177	A_left_2_02	17.0698		050715_D-left_1.14	8.7319	070915_forsk+dmso_2.27	5.67414	2015-07-23 Forskolin_C_right_1_19	18.8588	A_right_1_06	20.1774		050715_F-left_1.16	9.15805			2015-07-23 Forskolin_B_left_1_16	15.6447	B_left_2_02	15.0942		050715_C-left_2.17	8.17108			2015-07-23 Forskolin_B_right_2_15	14.1805	B_right_2_01	14.2561
050715_E-left_1.7	9.40156			2015-07-23 Forskolin_C_left_2_18	17.1107	A_left_2_01	16.5766		050715_D-left_2.7	8.66733	070915_forsk+dmso_2.20	5.15622	2015-07-23 Forskolin_C_right_2_05	18.7942	A_right_2_05	20.1529		050715_F-left_1.19	9.08841			2015-07-23 Forskolin_B_left_1_06	15.6147	B_left_1_15	14.9768		050715_C-left_1.32	8.08899			2015-07-23 Forskolin_B_right_1_15	14.0104	B_right_1_04	14.0004
050715_E-left_2.20	9.02983			2015-07-23 Forskolin_C_left_1_17	16.9014	A_left_1_09	15.875		050715_D-left_1.26	8.65027	070915_forsk+dmso_1.23	4.612	2015-07-23 Forskolin_C_right_2_03	18.5085	A_right_1_08	19.6296		050715_F-left_2.18	8.98279			2015-07-23 Forskolin_B_left_1_20	15.5146	B_left_1_11	14.8849		050715_C-left_2.36	7.76107			2015-07-23 Forskolin_B_right_2_09	13.7173	B_right_2_10	13.5481
050715_E-left_2.2	9.01			2015-07-23 Forskolin_C_left_1_02	16.8204	A_left_1_01	15.723		050715_D-left_2.42	8.59538	070915_forsk+dmso_1.14	3.91328	2015-07-23 Forskolin_C_right_2_08	18.4703	A_right_1_07	19.5614		050715_F-left_2.18	8.8389			2015-07-23 Forskolin_B_left_1_19	15.4063	B_left_1_13	14.8357		050715_C-left_1.9	7.61072			2015-07-23 Forskolin_B_right_1_03	13.6982	B_right_2_10	13.5199
050715_E-left_2.35	8.90854			2015-07-23 Forskolin_C_left_1_08	16.7977	A_left_1_09	15.6829		050715_D-left_2.21	8.39845			2015-07-23 Forskolin_C_right_1_11	18.1882	A_right_1_02	19.1109		050715_F-left_1.37	8.80523			2015-07-23 Forskolin_B_left_1_10	15.0942	B_left_2_10	14.7566		050715_C-left_1.37	7.39857			2015-07-23 Forskolin_B_right_1_02	13.6081	B_right_1_05	13.0904
050715_E-left_1.9	8.80523			2015-07-23 Forskolin_C_left_2_11	15.2944	A_left_1_06	15.6502		050715_D-left_2.33	8.04148			2015-07-23 Forskolin_C_right_1_17	18.1663	A_right_1_11	18.6404		050715_F-left_2.1	8.6724			2015-07-23 Forskolin_B_left_2_17	15.0168	B_left_2_09	13.8302		050715_C-left_1.6	7.30126			2015-07-23 Forskolin_B_right_2_16	13.1804	B_right_1_12	13.0904
050715_E-left_2.36	8.73605			2015-07-23 Forskolin_C_left_1_12	14.9549	A_left_1_10	15.2525		050715_D-left_1.10	7.96077			2015-07-23 Forskolin_C_right_1_21	17.9325	A_right_1_07	18.5103		050715_F-left_2.12	8.60553			2015-07-23 Forskolin_B_left_1_09	14.5864	B_left_2_11	13.5481		050715_C-left_2.4	7.17443			2015-07-23 Forskolin_B_right_2_21	12.942	B_right_2_09	12.8237
050715_E-left_2.9	8.25779			2015-07-23 Forskolin_C_left_1_24	14.8649	A_left_2_12	14.9267		050715_D-left_2.40	7.92895			2015-07-23 Forskolin_C_right_2_16	17.6722	A_right_1_06	18.4867		050715_F-left_1.33	8.59631			2015-07-23 Forskolin_B_left_1_08	14.3643	B_left_2_03	13.4016		050715_C-left_2.30	7.14122			2015-07-23 Forskolin_B_right_2_13	12.6217	B_right_2_04	12.4297
050715_E-left_1.34	7.98014			2015-07-23 Forskolin_C_left_1_04	14.8467	A_left_2_08	14.4463		050715_D-left_1.34	7.92803			2015-07-23 Forskolin_C_right_1_10	17.462	A_right_1_08	18.2573		050715_F-left_2.15	8.2767			2015-07-23 Forskolin_B_left_1_10	14.2661	B_left_2_13	13.1377		050715_C-left_1.31	6.95213			2015-07-23 Forskolin_B_right_1_19	12.5616	B_right_2_06	12.3278
050715_E-left_1.4	7.92019			2015-07-23 Forskolin_C_left_1_20	14.7566	A_left_1_11	14.3279		050715_D-left_1.36	7.79705			2015-07-23 Forskolin_C_right_1_14	17.462	A_right_1_13	18.2118		050715_F-left_2.31	7.98845			2015-07-23 Forskolin_B_left_1_10	14.0904	B_left_1_14	13.0685		050715_C-left_1.18	6.60485			2015-07-23 Forskolin_B_right_2_04	12.4115	B_right_1_03	12.1576
050715_E-left_1.13	7.72233			2015-07-23 Forskolin_C_left_2_16	14.2379	A_left_2_03	14.3279		050715_D-left_1.2	7.2413			2015-07-23 Forskolin_C_right_1_08	17.3719	A_right_1_04	18.0881		050715_F-left_1.11	7.94279			2015-07-23 Forskolin_B_left_2_22	14.065	B_left_2_09	13.0094		050715_C-left_2.29	6.56887			2015-07-23 Forskolin_B_right_2_11	12.3815	B_right_2_02	12.0247
050715_E-left_1.12	7.54385			2015-07-23 Forskolin_C_left_1_03	14.0158	A_left_2_06	14.1805		050715_D-left_1.4	6.96781			2015-07-23 Forskolin_C_right_1_13	17.1717	A_right_2_13	17.4192		050715_F-left_1.5	7.93172			2015-07-23 Forskolin_B_left_2_13	13.9585	B_left_2_02	12.8301		050715_C-left_2.21	6.39915			2015-07-23 Forskolin_B_right_2_07	12.2531	B_right_2_06	11.7408
050715_E-left_1.24	7.52448			2015-07-23 Forskolin_C_left_2_19	13.8074	A_left_2_08	14.156		050715_D-left_2.35	6.96089			2015-07-23 Forskolin_C_right_1_29	17.1617	A_right_1_11	17.1708		050715_F-left_1.9	7.30126			2015-07-23 Forskolin_B_left_1_10	13.4571	B_left_2_06	12.5616		050715_C-left_1.16	6.29354			2015-07-23 Forskolin_B_right_1_03	12.1804	B_right_1_19	11.6535
050715_E-left_1.6	7.47882			2015-07-23 Forskolin_C_left_2_01	13.7401	A_left_1_08	13.8702		050715_D-left_2.36	6.78195			2015-07-23 Forskolin_C_right_2_02	16.9679	A_right_2_17	17.058		050715_F-left_2.1	7.04944			2015-07-23 Forskolin_B_left_2_17	12.2613	B_left_2_10	12.5134		050715_C-left_1.26	6.21882			2015-07-23 Forskolin_B_right_1_09	12.1576	B_right_1_17	11.1957
050715_E-left_1.2	7.47052			2015-07-23 Forskolin_C_left_1_19	13.6982	A_left_1_06	13.7173		050715_D-left_2.19	6.37102			2015-07-23 Forskolin_C_right_2_08	15.8358	A_right_2_15	16.6648		050715_F-left_2.23	6.74643			2015-07-23 Forskolin_B_left_1_02	12.0675	B_left_1_14	12.4716		050715_C-left_1.15	6.07723			2015-07-23 Forskolin_B_right_1_04	11.9911	B_right_1_12	11.1329
050715_E-left_2.26	7.44423			2015-07-23 Forskolin_C_left_1_04	13.2924	A_left_2_08	12.8046		050715_D-left_1.38	6.21421			2015-07-23 Forskolin_C_right_2_23	15.2771	A_right_1_05	16.5756		050715_F-left_2.11	6.71738			2015-07-23 Forskolin_B_left_2_25	11.6134	B_left_2_12	12.4297		050715_C-left_2.37	5.97438			2015-07-23 Forskolin_B_right_1_07	11.9201	B_right_2_05	10.4668
050715_E-left_2.12	7.39857			2015-07-23 Forskolin_C_left_2_13	11.9201	A_left_2_15	12.5707		050715_D-left_2.9	6.21421			2015-07-23 Forskolin_C_right_2_01	15.2152	A_right_2_06	16.3718		050715_F-left_2.5	6.61453			2015-07-23 Forskolin_B_left_1_11	11.4178	B_left_2_07	12.2513		050715_C-left_1.28	5.62203			2015-07-23 Forskolin_B_right_1_17	11.7163	B_right_2_13	10.212
050715_E-left_1.9	7.34692			2015-07-23 Forskolin_C_left_2_16	11.8218	A_left_1_04	12.3278		050715_D-left_1.17	5.91627			2015-07-23 Forskolin_C_right_2_07	14.7011	A_right_2_07	16.2808		050715_F-left_1.15	6.42452			2015-07-23 Forskolin_B_left_1_11	11.4105	B_left_1_14	11.931		050715_C-left_2.31	5.51318			2015-07-23 Forskolin_B_right_1_04	11.5834	B_right_1_08	9.68786
050715_E-left_1.9	7.09556			2015-07-23 Forskolin_C_left_1_17	11.5306	A_left_1_12	11.1939		050715_D-left_1.19	5.87015			2015-07-23 Forskolin_C_right_2_13	14.56	A_right_1_08	16.2271		050715_F-left_1.1	6.16163			2015-07-23 Forskolin_B_left_1_04	11.1957	B_left_2_07	11.0929		050715_C-left_1.33	5.30749			2015-07-23 Forskolin_B_right_1_12	11.5306	B_right_1_07	9.19009
050715_E-left_1.5	7.05498			2015-07-23 Forskolin_C_left_1_06	11.1575	A_left_1_16	11.0101		050715_D-left_1.29	5.74471			2015-07-23 Forskolin_C_right_2_09	14.4599	A_right_1_05	15.773		050715_F-left_2.14	5.90613			2015-07-23 Forskolin_B_left_2_20	10.6124	B_left_1_11	10.4268		050715_C-left_1.35	5.30749			2015-07-23 Forskolin_B_right_1_11	11.4969	B_right_2_10	9.10819
050715_E-left_1.15	7.02961			2015-07-23 Forskolin_C_left_1_01	11.0046	A_left_2_05	10.92		050715_D-left_2.28	5.66584			2015-07-23 Forskolin_C_right_1_20	14.2561	A_right_1_05	15.5546		050715_F-left_1.22	5.7115			2015-07-23 Forskolin_B_left_2_17	10.4668	B_left_1_03	10.1219		050715_C-left_2.16	5.28443			2015-07-23 Forskolin_B_right_1_05	11.2704	B_right_2_10	7.83146
050715_E-left_2.36	6.89771			2015-07-23 Forskolin_C_left_2_19	10.4668	A_left_1_13	10.687		050715_D-left_2.17	5.60911			2015-07-23 Forskolin_C_right_1_02	14.0004	A_right_2_16	15.4054		050715_F-left_2.30	5.62203			2015-07-23 Forskolin_B_left_2_01	9.54044	B_left_2_05	9.54044		050715_C-left_1.13	3.30311			2015-07-23 Forskolin_B_right_1_14	10.4268	B_right_1_01	7.12348
050715_E-left_2.30	6.74643			2015-07-23 Forskolin_C_left_2_22	10.4668	A_left_2_12	10.4541		050715_D-left_2.5	5.51318			2015-07-23 Forskolin_C_right_1_01	13.893	A_right_1_12	15.3726		050715_F-left_2.11	5.42279			2015-07-23 Forskolin_B_left_1_10	8.42842	B_left_1_14	9.37573		050715_C-left_1.21	1.90153			2015-07-23 Forskolin_B_right_2_06	10.3367	B_right_1_08	7.12348
050715_E-left_2.1	6.47433			2015-07-23 Forskolin_C_left_1_16	9.45035	A_left_1_10	9.68786		050715_D-left_2.26	5.04092			2015-07-23 Forskolin_C_right_1_22	13.8302	A_right_1_13	15.0223		050715_F-left_2.25	5.30749			2015-07-23 Forskolin_B_left_1_09	8.18181	B_left_2_12	9.28018		050715_C-left_2.28	1.45831			2015-07-23 Forskolin_B_right_1_02	9.9463	B_right_2_04	6.58476
050715_E-left_2.35	6.39684			2015-07-23 Forskolin_C_left_2_21	8.58767	A_left_2_10	9.19009		050715_D-left_1.35	4.83522			2015-07-23 Forskolin_C_right_1_28	13.7173	A_right_2_04	14.9349		050715_F-left_2.20	5.25906			2015-07-23 Forskolin_B_left_1_11	7.92155	B_left_2_05	8.61952						2015-07-23 Forskolin_B_right_1_08	9.89625	B_right_1_08	5.78669
050715_E-left_2.36	6.29354			2015-07-23 Forskolin_C_left_1_20	8.50122	A_left_2_14	8.30193		050715_D-left_1.13	4.64613			2015-07-23 Forskolin_C_right_2_16	13.5199	A_right_2_18	14.1805		050715_F-left_2.8	4.90994			2015-07-23 Forskolin_B_left_1_07	7.51751	B_left_2_09	8.18181						2015-07-23 Forskolin_B_right_2_03	9.45035	B_right_1_19	5.30621
050715_E-left_1.20	6.0943			2015-07-23 Forskolin_C_left_2_12	8.42842	A_left_2_02	6.43461		050715_D-left_2.4	3.6896			2015-07-23 Forskolin_C_right_2_11	13.1377	A_right_1_04	13.8074		050715_F-left_2.27	4.64613			2015-07-23 Forskolin_B_left_2_13	7.51751	B_left_2_07	6.10428						2015-07-23 Forskolin_B_right_2_17	9.19009	B_right_2_11	2.87742
050715_E-left_1.31	5.88583			2015-07-23 Forskolin_C_left_1_23	8.39202	A_left_2_09	6.10428		050715_D-left_2.40	3.6896			2015-07-23 Forskolin_C_right_1_08	13.0904	A_right_2_19	13.4898		050715_F-left_1.11	4.41415			2015-07-23 Forskolin_B_left_1_19	5.82673	B_left_1_14	4.64009						2015-07-23 Forskolin_B_right_1_06	8.39202
050715_E-left_1.25	5.87015			2015-07-23 Forskolin_C_left_2_03	8.02529	A_left_2_03	5.78669						2015-07-23 Forskolin_C_right_1_19	13.0904	A_right_2_19	13.084		050715_F-left_2.10	3.76431			2015-07-23 Forskolin_B_left_2_01	5.57193	B_left_2_06	4.64009						2015-07-23 Forskolin_B_right_1_15	7.83146
050715_E-left_1.34	5.84387			2015-07-23 Forskolin_C_left_1_05	6.94694	A_left_2_12	3.75193						2015-07-23 Forskolin_C_right_1_06	12.8301	A_right_1_12	12.9366		050715_F-left_1.3	2.68926												2015-07-23 Forskolin_B_right_2_18	7.35098
050715_E-left_2.25	5.78668			2015-07-23 Forskolin_C_left_1_03	6.62935								2015-07-23 Forskolin_C_right_1_14	12.3278	A_right_1_15	12.2613															2015-07-23 Forskolin_B_right_1_03	6.58476
050715_E-left_1.2	5.7115			2015-07-23 Forskolin_C_left_2_03	5.57193								2015-07-23 Forskolin_C_right_1_28	11.4178	A_right_2_07	12.1804															2015-07-23 Forskolin_B_right_2_13	3.75193
050715_E-left_2.31	5.43663			2015-07-23 Forskolin_C_left_1_08	4.55								2015-07-23 Forskolin_C_right_2_15	11.2694	A_right_2_09	11.5825															2015-07-23 Forskolin_B_right_2_17	3.75193
050715_E-left_2.34	5.41633												2015-07-23 Forskolin_C_right_2_06	11.1329	A_right_1_14	10.8781
050715_E-left_2.11	5.0732												2015-07-23 Forskolin_C_right_1_14	9.9463	A_right_2_13	10.3767
050715_E-left_1.33	4.65766												2015-07-23 Forskolin_C_right_2_06	9.9463	A_right_1_12	10.2957
050715_E-left_1.2	4.1508												2015-07-23 Forskolin_C_right_1_18	9.19009	A_right_2_13	9.9463
050715_E-left_2.14	3.94188												2015-07-23 Forskolin_C_right_1_24	9.16734	A_right_2_04	9.45035
050715_E-left_2.2	2.306												2015-07-23 Forskolin_C_right_1_22	8.39202	A_right_2_06	9.16734
													2015-07-23 Forskolin_C_right_1_30	8.19
													2015-07-23 Forskolin_C_right_1_08	7.77777
													2015-07-23 Forskolin_C_right_1_20	3.75193
													2015-07-23 Forskolin_C_right_2_19	3.64

## Sheet: DLK KO
DLK WT + DMSO							DLK WT + FORSK							DLK KO + DMSO							DLK KO + FORSK								MEAN NEURITE LENGTH						TOTAL NEURONS
Image	Length (um)	Image	Length (um)	Image	Length (um)		Image	Length (um)	Image	Length (um)	Image	Length (um)		Image	Length (um)	Image	Length (um)	Image	Length (um)		Image	Length (um)	Image	Length (um)	Image	Length (um)		EXPT	DLK WT + DMSO	DLK WT + FORSK	DLK KO + DMSO	DLK KO + FORSK		EXPT	DLK WT + DMSO	DLK WT + FORSK	DLK KO + DMSO	DLK KO + FORSK
2015-06-18 aDRG_DLK WT_DMSO_2_Position002_z0_ch00	333.885	070215_WT1_DMSO_1_015	691.495	070215_WT2_DMSO_2_017	688.956		2015-06-18 aDRG_DLK WT_FORSK_2_Position015_z0_ch00	721.292	070215_WT1_FORSK_1_012	797.473	070215_WT2_FORSK_1_024	871.657		2015-06-18 aDRG_DLK KO_DMSO_2_Position015_z0_ch00	472.82	070215_KO1_DMSO_2_001	617.834	070215_KO2_DMSO_2_021	736.761		2015-06-18 aDRG_DLK KO_FORSK_2_Position002_z0_ch00	385.192	070215_KO1_FORSK_1_002	775.295	070215_KO2_FORSK_1_007	569.794		1	31.6959	109.403	31.8594	23.099		1	111	99	104	105
2015-06-18 aDRG_DLK WT_DMSO_1_Position012_z0_ch00	323.361	070215_WT1_DMSO_1_017	665.985	070215_WT2_DMSO_2_016	570.525		2015-06-18 aDRG_DLK WT_FORSK_1_Position019_z0_ch00	637.497	070215_WT1_FORSK_2_030	732.428	070215_WT2_FORSK_2_017	722.52		2015-06-18 aDRG_DLK KO_DMSO_2_Position004_z0_ch00	339.877	070215_KO1_DMSO_1_023	365.633	070215_KO2_DMSO_1_001	576.128		2015-06-18 aDRG_DLK KO_FORSK_1_Position022_z0_ch00	193.206	070215_KO1_FORSK_1_007	645.526	070215_KO2_FORSK_1_012	476.006		2	94.2886	150.611	48.7959	81.0694		2	159	131	110	131
2015-06-18 aDRG_DLK WT_DMSO_1_Position005_z0_ch00	254.291	070215_WT1_DMSO_2_019	584.498	070215_WT2_DMSO_2_007	522.901		2015-06-18 aDRG_DLK WT_FORSK_2_Position013_z0_ch00	632.147	070215_WT1_FORSK_1_019	619.389	070215_WT2_FORSK_1_007	717.034		2015-06-18 aDRG_DLK KO_DMSO_2_Position004_z0_ch00	247.99	070215_KO1_DMSO_1_024	354.76	070215_KO2_DMSO_2_001	471.25		2015-06-18 aDRG_DLK KO_FORSK_2_Position004_z0_ch00	174.722	070215_KO1_FORSK_1_019	592.086	070215_KO2_FORSK_1_006	475.389		3	80.7884	152.528	57.9653	56.2974		3	157	121	110	131
2015-06-18 aDRG_DLK WT_DMSO_2_Position024_z0_ch00	184.215	070215_WT1_DMSO_2_030	559.807	070215_WT2_DMSO_2_018	495.752		2015-06-18 aDRG_DLK WT_FORSK_2_Position014_z0_ch00	542.375	070215_WT1_FORSK_1_025	604.448	070215_WT2_FORSK_1_008	674.351		2015-06-18 aDRG_DLK KO_DMSO_2_Position007_z0_ch00	210.357	070215_KO1_DMSO_1_023	342.424	070215_KO2_DMSO_2_015	422.867		2015-06-18 aDRG_DLK KO_FORSK_2_Position005_z0_ch00	114.736	070215_KO1_FORSK_2_020	551.248	070215_KO2_FORSK_1_017	442.435
2015-06-18 aDRG_DLK WT_DMSO_1_Position007_z0_ch00	168.517	070215_WT1_DMSO_2_005	471.102	070215_WT2_DMSO_1_009	480.141		2015-06-18 aDRG_DLK WT_FORSK_1_Position020_z0_ch00	513.386	070215_WT1_FORSK_1_026	578.132	070215_WT2_FORSK_1_006	621.145		2015-06-18 aDRG_DLK KO_DMSO_1_Position011_z0_ch00	175.934	070215_KO1_DMSO_2_006	328.272	070215_KO2_DMSO_2_007	364.794		2015-06-18 aDRG_DLK KO_FORSK_1_Position020_z0_ch00	111.248	070215_KO1_FORSK_2_005	520.322	070215_KO2_FORSK_1_015	436.639		AVERAGE	68.9243	137.514	46.2068	53.4886
2015-06-18 aDRG_DLK WT_DMSO_1_Position006_z0_ch00	147.344	070215_WT1_DMSO_1_020	413.12	070215_WT2_DMSO_2_005	458.416		2015-06-18 aDRG_DLK WT_FORSK_2_Position016_z0_ch00	506.977	070215_WT1_FORSK_1_026	567.795	070215_WT2_FORSK_1_006	614.242		2015-06-18 aDRG_DLK KO_DMSO_1_Position013_z0_ch00	113.664	070215_KO1_DMSO_1_019	326.083	070215_KO2_DMSO_2_012	346.174		2015-06-18 aDRG_DLK KO_FORSK_1_Position029_z0_ch00	56.7285	070215_KO1_FORSK_2_019	486.945	070215_KO2_FORSK_1_003	417.733		STDEV	32.9398	24.3638	13.2441	29.0871
2015-06-18 aDRG_DLK WT_DMSO_2_Position006_z0_ch00	121.344	070215_WT1_DMSO_1_010	402.947	070215_WT2_DMSO_1_019	421.983		2015-06-18 aDRG_DLK WT_FORSK_2_Position017_z0_ch00	463.367	070215_WT1_FORSK_1_024	561.576	070215_WT2_FORSK_1_005	575.632		2015-06-18 aDRG_DLK KO_DMSO_2_Position025_z0_ch00	102.551	070215_KO1_DMSO_2_007	316.417	070215_KO2_DMSO_1_013	295.062		2015-06-18 aDRG_DLK KO_FORSK_1_Position004_z0_ch00	47.6658	070215_KO1_FORSK_1_013	462.835	070215_KO2_FOSRK_2_005	386.496		n	3	3	3	3
2015-06-18 aDRG_DLK WT_DMSO_1_Position006_z0_ch00	114.772	070215_WT1_DMSO_1_020	398.816	070215_WT2_DMSO_1_007	396.939		2015-06-18 aDRG_DLK WT_FORSK_2_Position011_z0_ch00	461.938	070215_WT1_FORSK_2_024	508.768	070215_WT2_FORSK_2_022	554.741		2015-06-18 aDRG_DLK KO_DMSO_1_Position013_z0_ch00	84.1495	070215_KO1_DMSO_1_020	287.608	070215_KO2_DMSO_1_010	285.138		2015-06-18 aDRG_DLK KO_FORSK_2_Position022_z0_ch00	46.754	070215_KO1_FORSK_1_011	449.393	070215_KO2_FORSK_1_014	337.545		SEM	19.0178	14.0665	7.6465	16.7934
2015-06-18 aDRG_DLK WT_DMSO_2_Position001_z0_ch00	107.626	070215_WT1_DMSO_1_020	378.031	070215_WT2_DMSO_1_020	384.69		2015-06-18 aDRG_DLK WT_FORSK_2_Position017_z0_ch00	445.503	070215_WT1_FORSK_2_026	501.046	070215_WT2_FORSK_2_032	528.931		2015-06-18 aDRG_DLK KO_DMSO_1_Position001_z0_ch00	81.3422	070215_KO1_DMSO_1_018	253.016	070215_KO2_DMSO_1_017	255.465		2015-06-18 aDRG_DLK KO_FORSK_2_Position013_z0_ch00	32.8292	070215_KO1_FORSK_1_020	433.808	070215_KO2_FOSRK_2_016	333.22
2015-06-18 aDRG_DLK WT_DMSO_2_Position023_z0_ch00	92.6544	070215_WT1_DMSO_1_018	371.624	070215_WT2_DMSO_1_005	366.529		2015-06-18 aDRG_DLK WT_FORSK_2_Position015_z0_ch00	440.496	070215_WT1_FORSK_1_021	500.61	070215_WT2_FORSK_1_023	527.471		2015-06-18 aDRG_DLK KO_DMSO_1_Position014_z0_ch00	71.3941	070215_KO1_DMSO_2_014	219.608	070215_KO2_DMSO_2_016	244.152		2015-06-18 aDRG_DLK KO_FORSK_2_Position002_z0_ch00	26.4291	070215_KO1_FORSK_1_010	379.517	070215_KO2_FORSK_1_011	292.817
2015-06-18 aDRG_DLK WT_DMSO_2_Position025_z0_ch00	70.4659	070215_WT1_DMSO_1_018	365.188	070215_WT2_DMSO_2_009	328.373		2015-06-18 aDRG_DLK WT_FORSK_2_Position014_z0_ch00	420.213	070215_WT1_FORSK_1_022	478.672	070215_WT2_FORSK_1_005	510.517		2015-06-18 aDRG_DLK KO_DMSO_1_Position011_z0_ch00	70.7798	070215_KO1_DMSO_2_001	158.633	070215_KO2_DMSO_1_002	213.144		2015-06-18 aDRG_DLK KO_FORSK_1_Position003_z0_ch00	23.8402	070215_KO1_FORSK_2_011	338.343	070215_KO2_FOSRK_2_004	242.526			# of NEURONS						% of NEURONS
2015-06-18 aDRG_DLK WT_DMSO_1_Position007_z0_ch00	68.5221	070215_WT1_DMSO_2_029	355.562	070215_WT2_DMSO_1_018	326.816		2015-06-18 aDRG_DLK WT_FORSK_2_Position017_z0_ch00	405.884	070215_WT1_FORSK_1_022	431.746	070215_WT2_FORSK_2_005	470.211		2015-06-18 aDRG_DLK KO_DMSO_2_Position025_z0_ch00	52.3741	070215_KO1_DMSO_2_013	107.303	070215_KO2_DMSO_1_015	138.487		2015-06-18 aDRG_DLK KO_FORSK_1_Position004_z0_ch00	21.1038	070215_KO1_FORSK_2_018	282.16	070215_KO2_FORSK_1_013	164.341		<50	DLK WT + DMSO	DLK WT + FORSK	DLK KO + DMSO	DLK KO + FORSK			DLK WT + DMSO	DLK WT + FORSK	DLK KO + DMSO	DLK KO + FORSK
2015-06-18 aDRG_DLK WT_DMSO_2_Position016_z0_ch00	62.9219	070215_WT1_DMSO_1_021	329.916	070215_WT2_DMSO_2_019	288.97		2015-06-18 aDRG_DLK WT_FORSK_1_Position018_z0_ch00	366.305	070215_WT1_FORSK_2_009	428.008	070215_WT2_FORSK_2_019	443.201		2015-06-18 aDRG_DLK KO_DMSO_1_Position013_z0_ch00	30.08	070215_KO1_DMSO_1_011	74.7065	070215_KO2_DMSO_1_011	119.009		2015-06-18 aDRG_DLK KO_FORSK_2_Position014_z0_ch00	20.5496	070215_KO1_FORSK_1_012	276.329	070215_KO2_FORSK_1_006	158.651		1	96	68	92	99		<50	86.4865	68.6869	88.4615	94.2857
2015-06-18 aDRG_DLK WT_DMSO_2_Position025_z0_ch00	62.0866	070215_WT1_DMSO_2_023	325.737	070215_WT2_DMSO_1_018	288.18		2015-06-18 aDRG_DLK WT_FORSK_2_Position006_z0_ch00	315.523	070215_WT1_FORSK_1_023	412.802	070215_WT2_FORSK_1_005	372.224		2015-06-18 aDRG_DLK KO_DMSO_2_Position015_z0_ch00	28.9107	070215_KO1_DMSO_2_013	73.5553	070215_KO2_DMSO_2_017	95.1851		2015-06-18 aDRG_DLK KO_FORSK_2_Position012_z0_ch00	20.323	070215_KO1_FORSK_1_021	275.735	070215_KO2_FORSK_1_008	138.542		2	105	71	94	105		1	66.0377	54.1985	85.4545	80.1527
2015-06-18 aDRG_DLK WT_DMSO_2_Position015_z0_ch00	50.2184	070215_WT1_DMSO_1_002	312.294	070215_WT2_DMSO_1_018	275.704		2015-06-18 aDRG_DLK WT_FORSK_1_Position006_z0_ch00	292.573	070215_WT1_FORSK_1_014	409.92	070215_WT2_FORSK_2_004	365.531		2015-06-18 aDRG_DLK KO_DMSO_2_Position001_z0_ch00	28.3201	070215_KO1_DMSO_2_016	54.4216	070215_KO2_DMSO_2_002	86.5601		2015-06-18 aDRG_DLK KO_FORSK_2_Position029_z0_ch00	19.9945	070215_KO1_FORSK_2_006	269.394	070215_KO2_FORSK_1_008	132.878		3	112	63	90	108		2	71.3376	52.0661	81.8182	82.4427
2015-06-18 aDRG_DLK WT_DMSO_2_Position021_z0_ch00	48.008	070215_WT1_DMSO_2_029	289.275	070215_WT2_DMSO_2_019	248.359		2015-06-18 aDRG_DLK WT_FORSK_2_Position017_z0_ch00	281.427	070215_WT1_FORSK_2_004	409.421	070215_WT2_FORSK_2_008	357.098		2015-06-18 aDRG_DLK KO_DMSO_1_Position010_z0_ch00	27.1972	070215_KO1_DMSO_2_012	52.4269	070215_KO2_DMSO_2_004	76.7294		2015-06-18 aDRG_DLK KO_FORSK_1_Position005_z0_ch00	19.7525	070215_KO1_FORSK_2_016	263.105	070215_KO2_FORSK_1_012	114.584								3
2015-06-18 aDRG_DLK WT_DMSO_2_Position016_z0_ch00	43.2059	070215_WT1_DMSO_1_021	285.096	070215_WT2_DMSO_2_017	243.912		2015-06-18 aDRG_DLK WT_FORSK_1_Position009_z0_ch00	277.891	070215_WT1_FORSK_2_006	407.195	070215_WT2_FORSK_2_001	355.225		2015-06-18 aDRG_DLK KO_DMSO_2_Position006_z0_ch00	23.165	070215_KO1_DMSO_1_021	49.7351	070215_KO2_DMSO_2_004	74.7565		2015-06-18 aDRG_DLK KO_FORSK_1_Position026_z0_ch00	19.747	070215_KO1_FORSK_2_019	255.422	070215_KO2_FORSK_1_008	86.4345		50-149
2015-06-18 aDRG_DLK WT_DMSO_1_Position008_z0_ch00	39.9172	070215_WT1_DMSO_1_020	284.561	070215_WT2_DMSO_1_019	230.865		2015-06-18 aDRG_DLK WT_FORSK_1_Position022_z0_ch00	238.676	070215_WT1_FORSK_2_015	405.626	070215_WT2_FORSK_2_018	350.49		2015-06-18 aDRG_DLK KO_DMSO_1_Position012_z0_ch00	22.2377	070215_KO1_DMSO_2_008	32.9111	070215_KO2_DMSO_2_005	62.4033		2015-06-18 aDRG_DLK KO_FORSK_2_Position008_z0_ch00	19.727	070215_KO1_FORSK_1_003	236.293	070215_KO2_FOSRK_2_016	78.9789		1	10	7	7	3		50-149	9.00901	7.07071	6.73077	2.85714
2015-06-18 aDRG_DLK WT_DMSO_2_Position023_z0_ch00	27.1198	070215_WT1_DMSO_1_019	275.011	070215_WT2_DMSO_2_019	223.249		2015-06-18 aDRG_DLK WT_FORSK_1_Position014_z0_ch00	224.317	070215_WT1_FORSK_2_029	403.869	070215_WT2_FORSK_2_015	348.353		2015-06-18 aDRG_DLK KO_DMSO_2_Position019_z0_ch00	22.0493	070215_KO1_DMSO_2_010	31.9328	070215_KO2_DMSO_2_004	52.699		2015-06-18 aDRG_DLK KO_FORSK_2_Position008_z0_ch00	19.2511	070215_KO1_FORSK_2_003	204.949	070215_KO2_FOSRK_2_011	73.9475		2	15	12	5	2		1	9.43396	9.16031	4.54545	1.52672
2015-06-18 aDRG_DLK WT_DMSO_1_Position007_z0_ch00	27.0143	070215_WT1_DMSO_1_002	269.107	070215_WT2_DMSO_1_004	222.42		2015-06-18 aDRG_DLK WT_FORSK_2_Position005_z0_ch00	215.318	070215_WT1_FORSK_1_027	400.602	070215_WT2_FORSK_1_017	319.591		2015-06-18 aDRG_DLK KO_DMSO_2_Position009_z0_ch00	21.8691	070215_KO1_DMSO_2_018	28.3938	070215_KO2_DMSO_1_020	50.7543		2015-06-18 aDRG_DLK KO_FORSK_1_Position013_z0_ch00	19.2283	070215_KO1_FORSK_2_002	179.893	070215_KO2_FOSRK_2_014	68.2091		3	17	14	9	10		2	10.828	11.5702	8.18182	7.63359
2015-06-18 aDRG_DLK WT_DMSO_2_Position021_z0_ch00	24.3607	070215_WT1_DMSO_2_030	260.407	070215_WT2_DMSO_2_018	204.359		2015-06-18 aDRG_DLK WT_FORSK_1_Position002_z0_ch00	199.024	070215_WT1_FORSK_1_024	399.41	070215_WT2_FORSK_2_021	318.814		2015-06-18 aDRG_DLK KO_DMSO_2_Position007_z0_ch00	21.6198	070215_KO1_DMSO_1_020	27.6622	070215_KO2_DMSO_1_004	48.7751		2015-06-18 aDRG_DLK KO_FORSK_2_Position011_z0_ch00	19.0463	070215_KO1_FORSK_1_006	174.018	070215_KO2_FOSRK_2_004	55.9605								3
2015-06-18 aDRG_DLK WT_DMSO_1_Position003_z0_ch00	22.4916	070215_WT1_DMSO_2_028	243.105	070215_WT2_DMSO_2_003	198.957		2015-06-18 aDRG_DLK WT_FORSK_1_Position022_z0_ch00	182.106	070215_WT1_FORSK_2_012	397.567	070215_WT2_FORSK_1_005	308.609		2015-06-18 aDRG_DLK KO_DMSO_2_Position004_z0_ch00	21.4432	070215_KO1_DMSO_1_024	25.1688	070215_KO2_DMSO_2_002	38.0171		2015-06-18 aDRG_DLK KO_FORSK_2_Position003_z0_ch00	18.696	070215_KO1_FORSK_2_019	167.495	070215_KO2_FOSRK_2_010	55.9504		150-249
2015-06-18 aDRG_DLK WT_DMSO_2_Position015_z0_ch00	20.6734	070215_WT1_DMSO_1_016	239.355	070215_WT2_DMSO_1_019	196.493		2015-06-18 aDRG_DLK WT_FORSK_1_Position007_z0_ch00	178.397	070215_WT1_FORSK_2_029	387.159	070215_WT2_FORSK_2_031	307.357		2015-06-18 aDRG_DLK KO_DMSO_1_Position006_z0_ch00	20.2539	070215_KO1_DMSO_2_005	24.4199	070215_KO2_DMSO_1_015	31.5661		2015-06-18 aDRG_DLK KO_FORSK_2_Position014_z0_ch00	18.4493	070215_KO1_FORSK_2_002	167.428	070215_KO2_FORSK_1_018	50.1119		1	2	7	3	2		150-249	1.8018	7.07071	2.88462	1.90476
2015-06-18 aDRG_DLK WT_DMSO_2_Position017_z0_ch00	20.5669	070215_WT1_DMSO_1_014	230.849	070215_WT2_DMSO_2_017	185.544		2015-06-18 aDRG_DLK WT_FORSK_1_Position011_z0_ch00	153.339	070215_WT1_FORSK_2_001	366.285	070215_WT2_FORSK_1_021	301.48		2015-06-18 aDRG_DLK KO_DMSO_2_Position016_z0_ch00	20.222	070215_KO1_DMSO_2_011	24.2606	070215_KO2_DMSO_1_007	30.899		2015-06-18 aDRG_DLK KO_FORSK_2_Position023_z0_ch00	17.7696	070215_KO1_FORSK_1_003	159.654	070215_KO2_FORSK_1_009	49.3675		2	18	15	2	7		1	11.3208	11.4504	1.81818	5.34351
2015-06-18 aDRG_DLK WT_DMSO_2_Position020_z0_ch00	20.1419	070215_WT1_DMSO_2_030	225.87	070215_WT2_DMSO_1_018	174.26		2015-06-18 aDRG_DLK WT_FORSK_1_Position020_z0_ch00	136.875	070215_WT1_FORSK_2_028	358.016	070215_WT2_FORSK_1_002	301.445		2015-06-18 aDRG_DLK KO_DMSO_1_Position014_z0_ch00	20.0964	070215_KO1_DMSO_2_015	24.014	070215_KO2_DMSO_1_010	28.5321		2015-06-18 aDRG_DLK KO_FORSK_1_Position024_z0_ch00	17.6676	070215_KO1_FORSK_2_008	116.931	070215_KO2_FORSK_1_018	48.0243		3	13	14	2	3		2	8.28025	11.5702	1.81818	2.29008
2015-06-18 aDRG_DLK WT_DMSO_2_Position024_z0_ch00	19.5759	070215_WT1_DMSO_1_007	214.28	070215_WT2_DMSO_1_018	171.692		2015-06-18 aDRG_DLK WT_FORSK_2_Position013_z0_ch00	134.307	070215_WT1_FORSK_1_014	349.904	070215_WT2_FORSK_2_003	299.572		2015-06-18 aDRG_DLK KO_DMSO_2_Position001_z0_ch00	19.8425	070215_KO1_DMSO_1_023	23.1267	070215_KO2_DMSO_2_017	27.9634		2015-06-18 aDRG_DLK KO_FORSK_1_Position029_z0_ch00	17.6676	070215_KO1_FORSK_1_017	97.6721	070215_KO2_FOSRK_2_003	44.5327								3
2015-06-18 aDRG_DLK WT_DMSO_2_Position014_z0_ch00	19.2283	070215_WT1_DMSO_1_004	203.482	070215_WT2_DMSO_2_018	168.693		2015-06-18 aDRG_DLK WT_FORSK_2_Position013_z0_ch00	119.478	070215_WT1_FORSK_1_021	329.106	070215_WT2_FORSK_1_004	273.258		2015-06-18 aDRG_DLK KO_DMSO_2_Position003_z0_ch00	18.1299	070215_KO1_DMSO_1_012	22.588	070215_KO2_DMSO_1_019	25.4154		2015-06-18 aDRG_DLK KO_FORSK_2_Position016_z0_ch00	17.462	070215_KO1_FORSK_2_019	46.7522	070215_KO2_FORSK_1_002	36.036		>250
2015-06-18 aDRG_DLK WT_DMSO_1_Position007_z0_ch00	19.2092	070215_WT1_DMSO_1_018	196.963	070215_WT2_DMSO_1_003	162.463		2015-06-18 aDRG_DLK WT_FORSK_1_Position002_z0_ch00	99.1117	070215_WT1_FORSK_1_027	322.808	070215_WT2_FORSK_2_019	267.071		2015-06-18 aDRG_DLK KO_DMSO_2_Position008_z0_ch00	18.0981	070215_KO1_DMSO_2_019	21.5761	070215_KO2_DMSO_1_005	24.4726		2015-06-18 aDRG_DLK KO_FORSK_1_Position007_z0_ch00	17.4092	070215_KO1_FORSK_1_018	45.6629	070215_KO2_FORSK_1_002	35.247		1	3	17	2	1		>250	2.7027	17.1717	1.92308	0.952381
2015-06-18 aDRG_DLK WT_DMSO_2_Position004_z0_ch00	19.0545	070215_WT1_DMSO_1_019	193.486	070215_WT2_DMSO_1_018	141.705		2015-06-18 aDRG_DLK WT_FORSK_1_Position014_z0_ch00	62.3132	070215_WT1_FORSK_2_008	315.641	070215_WT2_FORSK_1_005	259.055		2015-06-18 aDRG_DLK KO_DMSO_2_Position025_z0_ch00	17.7778	070215_KO1_DMSO_1_017	21.2813	070215_KO2_DMSO_1_009	23.6309		2015-06-18 aDRG_DLK KO_FORSK_1_Position010_z0_ch00	17.3573	070215_KO1_FORSK_2_016	44.0076	070215_KO2_FORSK_1_016	34.2169		2	21	33	9	17		1	13.2075	25.1908	8.18182	12.9771
2015-06-18 aDRG_DLK WT_DMSO_2_Position014_z0_ch00	18.9644	070215_WT1_DMSO_1_020	186.883	070215_WT2_DMSO_2_019	141.118		2015-06-18 aDRG_DLK WT_FORSK_2_Position014_z0_ch00	59.3675	070215_WT1_FORSK_2_023	308.926	070215_WT2_FORSK_1_006	250.904		2015-06-18 aDRG_DLK KO_DMSO_2_Position018_z0_ch00	17.6676	070215_KO1_DMSO_1_002	20.6907	070215_KO2_DMSO_1_015	22.1994		2015-06-18 aDRG_DLK KO_FORSK_2_Position014_z0_ch00	17.2818	070215_KO1_FORSK_1_003	43.9967	070215_KO2_FOSRK_2_010	33.3187		3	15	30	9	10		2	9.55414	24.7934	8.18182	7.63359
2015-06-18 aDRG_DLK WT_DMSO_2_Position012_z0_ch00	17.8924	070215_WT1_DMSO_2_004	184.122	070215_WT2_DMSO_2_017	138.17		2015-06-18 aDRG_DLK WT_FORSK_1_Position012_z0_ch00	57.4792	070215_WT1_FORSK_2_008	300.76	070215_WT2_FORSK_1_001	249.15		2015-06-18 aDRG_DLK KO_DMSO_1_Position013_z0_ch00	17.6322	070215_KO1_DMSO_2_011	20.5023	070215_KO2_DMSO_1_017	21.4396		2015-06-18 aDRG_DLK KO_FORSK_1_Position011_z0_ch00	17.1207	070215_KO1_FORSK_1_008	40.4377	070215_KO2_FOSRK_2_002	30.4604								3
2015-06-18 aDRG_DLK WT_DMSO_1_Position013_z0_ch00	17.6877	070215_WT1_DMSO_2_030	177.586	070215_WT2_DMSO_2_009	138.116		2015-06-18 aDRG_DLK WT_FORSK_2_Position003_z0_ch00	49.6132	070215_WT1_FORSK_1_027	288.526	070215_WT2_FORSK_1_022	238.718		2015-06-18 aDRG_DLK KO_DMSO_1_Position023_z0_ch00	17.5266	070215_KO1_DMSO_1_023	20.1774	070215_KO2_DMSO_2_013	20.9209		2015-06-18 aDRG_DLK KO_FORSK_2_Position014_z0_ch00	16.9251	070215_KO1_FORSK_2_002	40.07	070215_KO2_FOSRK_2_012	30.2675
2015-06-18 aDRG_DLK WT_DMSO_2_Position008_z0_ch00	17.6322	070215_WT1_DMSO_2_030	172.813	070215_WT2_DMSO_1_018	132.16		2015-06-18 aDRG_DLK WT_FORSK_1_Position022_z0_ch00	46.2344	070215_WT1_FORSK_2_014	253.086	070215_WT2_FORSK_2_021	236.966		2015-06-18 aDRG_DLK KO_DMSO_1_Position016_z0_ch00	17.3737	070215_KO1_DMSO_1_003	19.7361	070215_KO2_DMSO_1_014	20.7753		2015-06-18 aDRG_DLK KO_FORSK_1_Position008_z0_ch00	16.8778	070215_KO1_FORSK_2_002	36.6557	070215_KO2_FORSK_1_015	29.383
2015-06-18 aDRG_DLK WT_DMSO_1_Position003_z0_ch00	17.5676	070215_WT1_DMSO_2_030	171.973	070215_WT2_DMSO_1_018	126.08		2015-06-18 aDRG_DLK WT_FORSK_2_Position002_z0_ch00	36.8832	070215_WT1_FORSK_1_028	247.732	070215_WT2_FORSK_1_006	233.596		2015-06-18 aDRG_DLK KO_DMSO_1_Position005_z0_ch00	17.1517	070215_KO1_DMSO_2_003	19.6405	070215_KO2_DMSO_2_022	20.5724		2015-06-18 aDRG_DLK KO_FORSK_1_Position026_z0_ch00	16.6412	070215_KO1_FORSK_2_013	34.489	070215_KO2_FORSK_1_018	28.6923
2015-06-18 aDRG_DLK WT_DMSO_2_Position024_z0_ch00	17.1972	070215_WT1_DMSO_2_019	170.809	070215_WT2_DMSO_2_009	119.616		2015-06-18 aDRG_DLK WT_FORSK_2_Position014_z0_ch00	34.3352	070215_WT1_FORSK_2_011	239.682	070215_WT2_FORSK_2_026	233.593		2015-06-18 aDRG_DLK KO_DMSO_1_Position020_z0_ch00	17.0516	070215_KO1_DMSO_2_005	19.575	070215_KO2_DMSO_2_014	20.4149		2015-06-18 aDRG_DLK KO_FORSK_2_Position023_z0_ch00	16.5311	070215_KO1_FORSK_2_001	31.5133	070215_KO2_FORSK_1_013	26.2453
2015-06-18 aDRG_DLK WT_DMSO_2_Position024_z0_ch00	17.0698	070215_WT1_DMSO_1_021	169.396	070215_WT2_DMSO_2_018	113.383		2015-06-18 aDRG_DLK WT_FORSK_2_Position009_z0_ch00	27.7887	070215_WT1_FORSK_1_013	237.91	070215_WT2_FORSK_1_022	226.713		2015-06-18 aDRG_DLK KO_DMSO_1_Position016_z0_ch00	16.8113	070215_KO1_DMSO_2_003	19.5668	070215_KO2_DMSO_2_019	20.3267		2015-06-18 aDRG_DLK KO_FORSK_1_Position013_z0_ch00	16.319	070215_KO1_FORSK_1_001	31.4014	070215_KO2_FORSK_1_005	25.7312
2015-06-18 aDRG_DLK WT_DMSO_1_Position002_z0_ch00	16.8505	070215_WT1_DMSO_2_030	164.674	070215_WT2_DMSO_1_017	112.194		2015-06-18 aDRG_DLK WT_FORSK_1_Position005_z0_ch00	27.3364	070215_WT1_FORSK_1_026	228.092	070215_WT2_FORSK_1_006	221.324		2015-06-18 aDRG_DLK KO_DMSO_1_Position014_z0_ch00	16.4856	070215_KO1_DMSO_1_021	19.444	070215_KO2_DMSO_1_018	20.1565		2015-06-18 aDRG_DLK KO_FORSK_1_Position019_z0_ch00	16.0506	070215_KO1_FORSK_1_020	30.5378	070215_KO2_FORSK_1_015	24.7429
2015-06-18 aDRG_DLK WT_DMSO_2_Position008_z0_ch00	16.6412	070215_WT1_DMSO_2_030	162.969	070215_WT2_DMSO_1_008	102.962		2015-06-18 aDRG_DLK WT_FORSK_1_Position016_z0_ch00	26.6575	070215_WT1_FORSK_1_026	209.121	070215_WT2_FORSK_2_011	218.271		2015-06-18 aDRG_DLK KO_DMSO_2_Position013_z0_ch00	16.4392	070215_KO1_DMSO_2_018	18.7524	070215_KO2_DMSO_1_007	19.7788		2015-06-18 aDRG_DLK KO_FORSK_1_Position018_z0_ch00	16.0333	070215_KO1_FORSK_2_018	29.5131	070215_KO2_FOSRK_2_003	23.6045
2015-06-18 aDRG_DLK WT_DMSO_1_Position008_z0_ch00	16.4619	070215_WT1_DMSO_2_016	153.522	070215_WT2_DMSO_2_019	100.909		2015-06-18 aDRG_DLK WT_FORSK_1_Position019_z0_ch00	20.9892	070215_WT1_FORSK_2_025	204.266	070215_WT2_FORSK_1_005	206.808		2015-06-18 aDRG_DLK KO_DMSO_1_Position015_z0_ch00	16.1707	070215_KO1_DMSO_2_008	18.5658	070215_KO2_DMSO_2_011	19.3967		2015-06-18 aDRG_DLK KO_FORSK_2_Position005_z0_ch00	15.773	070215_KO1_FORSK_2_005	29.1746	070215_KO2_FOSRK_2_004	22.6281
2015-06-18 aDRG_DLK WT_DMSO_2_Position004_z0_ch00	16.4392	070215_WT1_DMSO_2_030	145.282	070215_WT2_DMSO_2_018	91.7726		2015-06-18 aDRG_DLK WT_FORSK_1_Position020_z0_ch00	20.1529	070215_WT1_FORSK_1_026	195.405	070215_WT2_FORSK_1_007	192.34		2015-06-18 aDRG_DLK KO_DMSO_1_Position015_z0_ch00	15.8358	070215_KO1_DMSO_1_013	18.1927	070215_KO2_DMSO_1_019	19.322		2015-06-18 aDRG_DLK KO_FORSK_1_Position003_z0_ch00	15.6147	070215_KO1_FORSK_1_017	27.705	070215_KO2_FOSRK_2_015	22.2076
2015-06-18 aDRG_DLK WT_DMSO_2_Position023_z0_ch00	16.431	070215_WT1_DMSO_1_003	138.844	070215_WT2_DMSO_2_004	91.3858		2015-06-18 aDRG_DLK WT_FORSK_2_Position015_z0_ch00	19.6442	070215_WT1_FORSK_1_027	191.938	070215_WT2_FORSK_1_020	173.274		2015-06-18 aDRG_DLK KO_DMSO_2_Position022_z0_ch00	15.6829	070215_KO1_DMSO_2_014	18.1882	070215_KO2_DMSO_1_006	18.9544		2015-06-18 aDRG_DLK KO_FORSK_1_Position012_z0_ch00	15.5128	070215_KO1_FORSK_2_015	26.0515	070215_KO2_FOSRK_2_015	21.3641
2015-06-18 aDRG_DLK WT_DMSO_2_Position024_z0_ch00	16.3163	070215_WT1_DMSO_2_030	137.544	070215_WT2_DMSO_2_019	83.1267		2015-06-18 aDRG_DLK WT_FORSK_2_Position007_z0_ch00	18.7305	070215_WT1_FORSK_1_016	190.582	070215_WT2_FORSK_2_019	162.216		2015-06-18 aDRG_DLK KO_DMSO_2_Position006_z0_ch00	15.5819	070215_KO1_DMSO_1_015	18.1281	070215_KO2_DMSO_2_019	18.9162		2015-06-18 aDRG_DLK KO_FORSK_1_Position029_z0_ch00	15.4436	070215_KO1_FORSK_1_022	24.3762	070215_KO2_FOSRK_2_014	21.2139
2015-06-18 aDRG_DLK WT_DMSO_2_Position016_z0_ch00	16.2936	070215_WT1_DMSO_2_030	131.432	070215_WT2_DMSO_2_019	80.9654		2015-06-18 aDRG_DLK WT_FORSK_2_Position012_z0_ch00	18.1882	070215_WT1_FORSK_1_024	187.893	070215_WT2_FORSK_2_005	160.676		2015-06-18 aDRG_DLK KO_DMSO_1_Position014_z0_ch00	15.4063	070215_KO1_DMSO_1_016	17.8424	070215_KO2_DMSO_1_006	18.5058		2015-06-18 aDRG_DLK KO_FORSK_1_Position017_z0_ch00	15.1624	070215_KO1_FORSK_2_019	24.2042	070215_KO2_FORSK_1_001	20.9509
2015-06-18 aDRG_DLK WT_DMSO_2_Position025_z0_ch00	16.2726	070215_WT1_DMSO_1_005	122.288	070215_WT2_DMSO_1_017	80.3748		2015-06-18 aDRG_DLK WT_FORSK_2_Position012_z0_ch00	17.7577	070215_WT1_FORSK_1_008	187.521	070215_WT2_FORSK_2_012	158.659		2015-06-18 aDRG_DLK KO_DMSO_2_Position020_z0_ch00	15.4063	070215_KO1_DMSO_2_013	16.9797	070215_KO2_DMSO_2_010	17.7241		2015-06-18 aDRG_DLK KO_FORSK_1_Position002_z0_ch00	14.5982	070215_KO1_FORSK_1_019	24.0841	070215_KO2_FORSK_1_007	20.5906
2015-06-18 aDRG_DLK WT_DMSO_1_Position007_z0_ch00	16.1816	070215_WT1_DMSO_1_019	111.177	070215_WT2_DMSO_2_012	79.1937		2015-06-18 aDRG_DLK WT_FORSK_1_Position022_z0_ch00	17.5821	070215_WT1_FORSK_1_004	186.808	070215_WT2_FORSK_2_009	131.529		2015-06-18 aDRG_DLK KO_DMSO_1_Position007_z0_ch00	15.3672	070215_KO1_DMSO_2_002	16.9597	070215_KO2_DMSO_2_018	17.523		2015-06-18 aDRG_DLK KO_FORSK_1_Position010_z0_ch00	14.4408	070215_KO1_FORSK_2_010	23.7264	070215_KO2_FOSRK_2_012	20.515
2015-06-18 aDRG_DLK WT_DMSO_1_Position013_z0_ch00	16.1707	070215_WT1_DMSO_2_024	111.14	070215_WT2_DMSO_2_018	49.919		2015-06-18 aDRG_DLK WT_FORSK_1_Position007_z0_ch00	17.4092	070215_WT1_FORSK_2_004	180.886	070215_WT2_FORSK_1_011	130.805		2015-06-18 aDRG_DLK KO_DMSO_1_Position023_z0_ch00	15.2771	070215_KO1_DMSO_2_012	16.8887	070215_KO2_DMSO_1_004	17.5002		2015-06-18 aDRG_DLK KO_FORSK_2_Position010_z0_ch00	14.3507	070215_KO1_FORSK_1_014	22.9811	070215_KO2_FORSK_1_016	20.5023
2015-06-18 aDRG_DLK WT_DMSO_2_Position017_z0_ch00	16.0333	070215_WT1_DMSO_1_005	92.5242	070215_WT2_DMSO_2_018	48.9744		2015-06-18 aDRG_DLK WT_FORSK_1_Position008_z0_ch00	16.8204	070215_WT1_FORSK_1_026	163.126	070215_WT2_FORSK_2_028	129.915		2015-06-18 aDRG_DLK KO_DMSO_1_Position016_z0_ch00	15.2025	070215_KO1_DMSO_2_001	16.8013	070215_KO2_DMSO_2_006	17.4192		2015-06-18 aDRG_DLK KO_FORSK_1_Position023_z0_ch00	14.338	070215_KO1_FORSK_2_003	22.6199	070215_KO2_FORSK_1_003	20.323		TOTAL						TOTAL
2015-06-18 aDRG_DLK WT_DMSO_1_Position001_z0_ch00	15.9605	070215_WT1_DMSO_2_017	90.2074	070215_WT2_DMSO_1_002	44.2779		2015-06-18 aDRG_DLK WT_FORSK_2_Position011_z0_ch00	16.7049	070215_WT1_FORSK_1_011	152.361	070215_WT2_FORSK_2_001	127.938		2015-06-18 aDRG_DLK KO_DMSO_2_Position009_z0_ch00	15.0669	070215_KO1_DMSO_1_010	16.6648	070215_KO2_DMSO_2_011	17.1617		2015-06-18 aDRG_DLK KO_FORSK_2_Position020_z0_ch00	14.2761	070215_KO1_FORSK_2_020	21.9474	070215_KO2_FORSK_1_008	19.8944		1	111	99	104	105		1	100	100	100	100
2015-06-18 aDRG_DLK WT_DMSO_1_Position010_z0_ch00	15.9095	070215_WT1_DMSO_2_022	85.0259	070215_WT2_DMSO_2_019	43.2468		2015-06-18 aDRG_DLK WT_FORSK_2_Position001_z0_ch00	16.6412	070215_WT1_FORSK_2_027	138.404	070215_WT2_FORSK_2_006	106.569		2015-06-18 aDRG_DLK KO_DMSO_1_Position022_z0_ch00	14.8849	070215_KO1_DMSO_2_003	16.4883	070215_KO2_DMSO_2_015	16.5538		2015-06-18 aDRG_DLK KO_FORSK_1_Position029_z0_ch00	14.1805	070215_KO1_FORSK_2_010	21.8018	070215_KO2_FOSRK_2_014	19.6624		2	159	131	110	131		2	100	100	100	100
2015-06-18 aDRG_DLK WT_DMSO_1_Position009_z0_ch00	15.875	070215_WT1_DMSO_2_015	84.3816	070215_WT2_DMSO_1_008	42.457		2015-06-18 aDRG_DLK WT_FORSK_1_Position001_z0_ch00	16.3108	070215_WT1_FORSK_2_015	133.717	070215_WT2_FORSK_2_025	103.695		2015-06-18 aDRG_DLK KO_DMSO_2_Position025_z0_ch00	14.8467	070215_KO1_DMSO_2_014	16.4883	070215_KO2_DMSO_2_003	16.4018		2015-06-18 aDRG_DLK KO_FORSK_1_Position004_z0_ch00	14.0904	070215_KO1_FORSK_2_018	21.5506	070215_KO2_FORSK_1_008	19.413		3	157	121	110	131		3	100	100	100	100
2015-06-18 aDRG_DLK WT_DMSO_1_Position007_z0_ch00	15.7785	070215_WT1_DMSO_1_021	71.031	070215_WT2_DMSO_1_011	37.5129		2015-06-18 aDRG_DLK WT_FORSK_2_Position013_z0_ch00	16.3108	070215_WT1_FORSK_2_017	127.965	070215_WT2_FORSK_1_009	100.696		2015-06-18 aDRG_DLK KO_DMSO_1_Position017_z0_ch00	14.7966	070215_KO1_DMSO_2_002	16.3982	070215_KO2_DMSO_2_005	16.4018		2015-06-18 aDRG_DLK KO_FORSK_1_Position005_z0_ch00	14.0677	070215_KO1_FORSK_1_004	20.9964	070215_KO2_FORSK_1_014	19.3148
2015-06-18 aDRG_DLK WT_DMSO_2_Position013_z0_ch00	15.4927	070215_WT1_DMSO_2_029	68.3992	070215_WT2_DMSO_1_018	35.7293		2015-06-18 aDRG_DLK WT_FORSK_1_Position023_z0_ch00	16.1225	070215_WT1_FORSK_2_013	121.865	070215_WT2_FORSK_2_022	100.311		2015-06-18 aDRG_DLK KO_DMSO_1_Position010_z0_ch00	14.6501	070215_KO1_DMSO_2_002	15.9605	070215_KO2_DMSO_1_013	16.319		2015-06-18 aDRG_DLK KO_FORSK_1_Position014_z0_ch00	13.8702	070215_KO1_FORSK_1_008	20.849	070215_KO2_FOSRK_2_003	19.1992
2015-06-18 aDRG_DLK WT_DMSO_2_Position024_z0_ch00	15.237	070215_WT1_DMSO_2_030	68.2891	070215_WT2_DMSO_1_018	34.9813		2015-06-18 aDRG_DLK WT_FORSK_2_Position017_z0_ch00	16.0506	070215_WT1_FORSK_1_028	108.679	070215_WT2_FORSK_2_017	91.8372		2015-06-18 aDRG_DLK KO_DMSO_2_Position017_z0_ch00	14.4062	070215_KO1_DMSO_2_018	15.6829	070215_KO2_DMSO_2_020	16.2908		2015-06-18 aDRG_DLK KO_FORSK_2_Position024_z0_ch00	13.5526	070215_KO1_FORSK_2_002	20.6734	070215_KO2_FOSRK_2_010	18.6404
2015-06-18 aDRG_DLK WT_DMSO_1_Position006_z0_ch00	15.2152	070215_WT1_DMSO_2_021	50.5842	070215_WT2_DMSO_1_009	33.2669		2015-06-18 aDRG_DLK WT_FORSK_2_Position016_z0_ch00	15.9605	070215_WT1_FORSK_1_028	103.371	070215_WT2_FORSK_2_029	88.1117		2015-06-18 aDRG_DLK KO_DMSO_2_Position025_z0_ch00	14.3143	070215_KO1_DMSO_1_015	15.5146	070215_KO2_DMSO_1_003	16.0943		2015-06-18 aDRG_DLK KO_FORSK_2_Position029_z0_ch00	13.5481	070215_KO1_FORSK_1_016	20.6725	070215_KO2_FOSRK_2_006	18.4493
2015-06-18 aDRG_DLK WT_DMSO_1_Position008_z0_ch00	15.0168	070215_WT1_DMSO_2_007	49.2383	070215_WT2_DMSO_1_002	32.3714		2015-06-18 aDRG_DLK WT_FORSK_1_Position019_z0_ch00	15.6829	070215_WT1_FORSK_2_020	86.9551	070215_WT2_FORSK_2_025	76.5037		2015-06-18 aDRG_DLK KO_DMSO_2_Position014_z0_ch00	14.1805	070215_KO1_DMSO_1_024	15.2944	070215_KO2_DMSO_2_017	15.975		2015-06-18 aDRG_DLK KO_FORSK_2_Position027_z0_ch00	13.1804	070215_KO1_FORSK_2_020	20.6725	070215_KO2_FOSRK_2_001	18.2501
2015-06-18 aDRG_DLK WT_DMSO_1_Position006_z0_ch00	14.4062	070215_WT1_DMSO_2_014	46.1579	070215_WT2_DMSO_1_018	29.4804		2015-06-18 aDRG_DLK WT_FORSK_1_Position023_z0_ch00	15.6147	070215_WT1_FORSK_1_022	71.101	070215_WT2_FORSK_1_021	75.0459		2015-06-18 aDRG_DLK KO_DMSO_1_Position022_z0_ch00	14.156	070215_KO1_DMSO_1_004	15.1069	070215_KO2_DMSO_1_013	15.875		2015-06-18 aDRG_DLK KO_FORSK_1_Position009_z0_ch00	13.0904	070215_KO1_FORSK_1_017	20.5087	070215_KO2_FOSRK_2_009	17.9215
2015-06-18 aDRG_DLK WT_DMSO_2_Position003_z0_ch00	14.3279	070215_WT1_DMSO_2_011	45.4991	070215_WT2_DMSO_1_010	26.0469		2015-06-18 aDRG_DLK WT_FORSK_1_Position010_z0_ch00	15.0942	070215_WT1_FORSK_1_026	71.0109	070215_WT2_FORSK_2_013	65.51		2015-06-18 aDRG_DLK KO_DMSO_1_Position018_z0_ch00	14.0158	070215_KO1_DMSO_1_006	14.8849	070215_KO2_DMSO_2_011	15.6147		2015-06-18 aDRG_DLK KO_FORSK_2_Position019_z0_ch00	13.0321	070215_KO1_FORSK_1_004	20.4595	070215_KO2_FORSK_1_013	17.8942
2015-06-18 aDRG_DLK WT_DMSO_1_Position008_z0_ch00	14.1805	070215_WT1_DMSO_1_019	43.0357	070215_WT2_DMSO_1_008	25.7667		2015-06-18 aDRG_DLK WT_FORSK_1_Position020_z0_ch00	15.0942	070215_WT1_FORSK_2_029	70.0227	070215_WT2_FORSK_1_025	53.7919		2015-06-18 aDRG_DLK KO_DMSO_2_Position027_z0_ch00	13.5526	070215_KO1_DMSO_1_011	14.8357	070215_KO2_DMSO_1_008	15.5146		2015-06-18 aDRG_DLK KO_FORSK_1_Position018_z0_ch00	13.0276	070215_KO1_FORSK_2_014	20.1419	070215_KO2_FOSRK_2_001	17.7696
2015-06-18 aDRG_DLK WT_DMSO_1_Position007_z0_ch00	14.0904	070215_WT1_DMSO_1_014	41.2649	070215_WT2_DMSO_2_019	24.6919		2015-06-18 aDRG_DLK WT_FORSK_2_Position013_z0_ch00	15.0223	070215_WT1_FORSK_2_029	58.5631	070215_WT2_FORSK_2_003	49.3993		2015-06-18 aDRG_DLK KO_DMSO_1_Position022_z0_ch00	13.4962	070215_KO1_DMSO_2_014	14.479	070215_KO2_DMSO_2_019	15.5146		2015-06-18 aDRG_DLK KO_FORSK_2_Position017_z0_ch00	13.0276	070215_KO1_FORSK_2_019	19.6979	070215_KO2_FORSK_1_005	17.7304
2015-06-18 aDRG_DLK WT_DMSO_1_Position015_z0_ch00	13.7173	070215_WT1_DMSO_1_019	41.0346	070215_WT2_DMSO_2_019	24.2169		2015-06-18 aDRG_DLK WT_FORSK_1_Position006_z0_ch00	15.0041	070215_WT1_FORSK_1_016	57.6531	070215_WT2_FORSK_1_009	33.3424		2015-06-18 aDRG_DLK KO_DMSO_2_Position005_z0_ch00	13.3115	070215_KO1_DMSO_2_014	14.3279	070215_KO2_DMSO_1_013	15.2771		2015-06-18 aDRG_DLK KO_FORSK_1_Position029_z0_ch00	12.9611	070215_KO1_FORSK_1_013	19.3757	070215_KO2_FORSK_1_018	17.6322
2015-06-18 aDRG_DLK WT_DMSO_2_Position024_z0_ch00	13.7173	070215_WT1_DMSO_1_011	40.7771	070215_WT2_DMSO_1_009	24.0204		2015-06-18 aDRG_DLK WT_FORSK_1_Position020_z0_ch00	14.8849	070215_WT1_FORSK_2_020	43.6336	070215_WT2_FORSK_1_013	25.1833		2015-06-18 aDRG_DLK KO_DMSO_1_Position009_z0_ch00	13.2924	070215_KO1_DMSO_2_016	14.3143	070215_KO2_DMSO_2_006	15.0942		2015-06-18 aDRG_DLK KO_FORSK_1_Position001_z0_ch00	12.9366	070215_KO1_FORSK_1_011	19.1764	070215_KO2_FOSRK_2_007	17.5011
2015-06-18 aDRG_DLK WT_DMSO_2_Position005_z0_ch00	13.6582	070215_WT1_DMSO_1_019	35.8567	070215_WT2_DMSO_1_018	22.8738		2015-06-18 aDRG_DLK WT_FORSK_2_Position012_z0_ch00	14.8467	070215_WT1_FORSK_1_020	41.0856	070215_WT2_FORSK_1_005	22.2659		2015-06-18 aDRG_DLK KO_DMSO_1_Position004_z0_ch00	13.0904	070215_KO1_DMSO_1_012	14.2379	070215_KO2_DMSO_2_007	15.0796		2015-06-18 aDRG_DLK KO_FORSK_2_Position009_z0_ch00	12.831	070215_KO1_FORSK_2_002	19.1564	070215_KO2_FORSK_1_018	17.2618
2015-06-18 aDRG_DLK WT_DMSO_2_Position018_z0_ch00	13.2278	070215_WT1_DMSO_2_013	32.3414	070215_WT2_DMSO_2_008	22.5498		2015-06-18 aDRG_DLK WT_FORSK_2_Position014_z0_ch00	14.8467	070215_WT1_FORSK_1_002	28.4803	070215_WT2_FORSK_1_007	21.8782		2015-06-18 aDRG_DLK KO_DMSO_2_Position025_z0_ch00	13.0822	070215_KO1_DMSO_2_004	14.0158	070215_KO2_DMSO_1_010	14.8467		2015-06-18 aDRG_DLK KO_FORSK_1_Position025_z0_ch00	12.8237	070215_KO1_FORSK_2_017	18.9644	070215_KO2_FORSK_1_018	17.229
2015-06-18 aDRG_DLK WT_DMSO_1_Position007_z0_ch00	13.0904	070215_WT1_DMSO_1_005	27.0498	070215_WT2_DMSO_1_016	22.1103		2015-06-18 aDRG_DLK WT_FORSK_2_Position012_z0_ch00	14.7729	070215_WT1_FORSK_2_010	26.1097	070215_WT2_FORSK_2_010	21.6198		2015-06-18 aDRG_DLK KO_DMSO_1_Position002_z0_ch00	12.8219	070215_KO1_DMSO_2_011	13.9257	070215_KO2_DMSO_1_005	14.7966		2015-06-18 aDRG_DLK KO_FORSK_1_Position027_z0_ch00	12.7746	070215_KO1_FORSK_1_019	18.696	070215_KO2_FOSRK_2_013	16.8031
2015-06-18 aDRG_DLK WT_DMSO_2_Position025_z0_ch00	13.0512	070215_WT1_DMSO_1_019	26.0597	070215_WT2_DMSO_1_019	21.4514		2015-06-18 aDRG_DLK WT_FORSK_1_Position011_z0_ch00	14.1805	070215_WT1_FORSK_2_004	23.9303	070215_WT2_FORSK_2_010	20.7362		2015-06-18 aDRG_DLK KO_DMSO_2_Position015_z0_ch00	12.8219	070215_KO1_DMSO_1_005	13.9203	070215_KO2_DMSO_2_002	14.7011		2015-06-18 aDRG_DLK KO_FORSK_2_Position006_z0_ch00	12.7318	070215_KO1_FORSK_2_020	18.6505	070215_KO2_FOSRK_2_015	16.8031
2015-06-18 aDRG_DLK WT_DMSO_1_Position011_z0_ch00	12.9611	070215_WT1_DMSO_2_030	25.439	070215_WT2_DMSO_1_016	21.2403		2015-06-18 aDRG_DLK WT_FORSK_1_Position010_z0_ch00	13.9585	070215_WT1_FORSK_2_002	23.0831	070215_WT2_FORSK_1_014	20.5414		2015-06-18 aDRG_DLK KO_DMSO_1_Position015_z0_ch00	12.7318	070215_KO1_DMSO_2_013	13.7483	070215_KO2_DMSO_2_015	14.6182		2015-06-18 aDRG_DLK KO_FORSK_1_Position003_z0_ch00	12.679	070215_KO1_FORSK_1_015	18.6486	070215_KO2_FOSRK_2_003	16.5019
2015-06-18 aDRG_DLK WT_DMSO_1_Position019_z0_ch00	12.8301	070215_WT1_DMSO_1_021	23.68	070215_WT2_DMSO_1_007	20.6734		2015-06-18 aDRG_DLK WT_FORSK_2_Position006_z0_ch00	13.9093	070215_WT1_FORSK_2_025	22.9975	070215_WT2_FORSK_2_014	20.0964		2015-06-18 aDRG_DLK KO_DMSO_2_Position026_z0_ch00	12.6217	070215_KO1_DMSO_2_015	13.6618	070215_KO2_DMSO_1_008	14.5864		2015-06-18 aDRG_DLK KO_FORSK_2_Position026_z0_ch00	12.5134	070215_KO1_FORSK_1_009	18.4493	070215_KO2_FORSK_1_018	16.1634
2015-06-18 aDRG_DLK WT_DMSO_2_Position010_z0_ch00	12.7336	070215_WT1_DMSO_2_002	23.1058	070215_WT2_DMSO_1_019	20.6734		2015-06-18 aDRG_DLK WT_FORSK_2_Position014_z0_ch00	13.61	070215_WT1_FORSK_1_025	22.8328	070215_WT2_FORSK_2_020	19.6569		2015-06-18 aDRG_DLK KO_DMSO_1_Position014_z0_ch00	12.4888	070215_KO1_DMSO_1_013	13.5199	070215_KO2_DMSO_1_004	14.4408		2015-06-18 aDRG_DLK KO_FORSK_1_Position029_z0_ch00	12.4179	070215_KO1_FORSK_2_017	18.2	070215_KO2_FORSK_1_010	15.9104
2015-06-18 aDRG_DLK WT_DMSO_2_Position023_z0_ch00	12.7336	070215_WT1_DMSO_2_014	22.012	070215_WT2_DMSO_1_018	20.1692		2015-06-18 aDRG_DLK WT_FORSK_2_Position011_z0_ch00	13.1804	070215_WT1_FORSK_2_030	22.3451	070215_WT2_FORSK_2_027	19.3302		2015-06-18 aDRG_DLK KO_DMSO_2_Position015_z0_ch00	12.4297	070215_KO1_DMSO_1_009	13.3424	070215_KO2_DMSO_1_020	14.3279		2015-06-18 aDRG_DLK KO_FORSK_2_Position018_z0_ch00	12.2613	070215_KO1_FORSK_1_005	18.1281	070215_KO2_FORSK_1_018	15.7976
2015-06-18 aDRG_DLK WT_DMSO_2_Position012_z0_ch00	12.5707	070215_WT1_DMSO_1_020	21.9774	070215_WT2_DMSO_2_019	20.0964		2015-06-18 aDRG_DLK WT_FORSK_1_Position021_z0_ch00	13.0512	070215_WT1_FORSK_1_016	20.8945	070215_WT2_FORSK_1_022	18.5986		2015-06-18 aDRG_DLK KO_DMSO_2_Position026_z0_ch00	12.4179	070215_KO1_DMSO_1_009	13.2278	070215_KO2_DMSO_2_005	14.3279		2015-06-18 aDRG_DLK KO_FORSK_1_Position009_z0_ch00	12.1804	070215_KO1_FORSK_1_009	17.9898	070215_KO2_FOSRK_2_008	15.6502
2015-06-18 aDRG_DLK WT_DMSO_1_Position004_z0_ch00	12.4716	070215_WT1_DMSO_2_029	21.8018	070215_WT2_DMSO_2_001	19.9945		2015-06-18 aDRG_DLK WT_FORSK_1_Position021_z0_ch00	13.0321	070215_WT1_FORSK_2_016	20.7025	070215_WT2_FORSK_1_004	18.2983		2015-06-18 aDRG_DLK KO_DMSO_2_Position004_z0_ch00	12.3278	070215_KO1_DMSO_1_019	13.2278	070215_KO2_DMSO_2_020	14.1805		2015-06-18 aDRG_DLK KO_FORSK_1_Position016_z0_ch00	12.0675	070215_KO1_FORSK_2_007	17.7778	070215_KO2_FORSK_1_017	15.6274
2015-06-18 aDRG_DLK WT_DMSO_2_Position023_z0_ch00	12.2613	070215_WT1_DMSO_1_006	21.779	070215_WT2_DMSO_1_020	19.9827		2015-06-18 aDRG_DLK WT_FORSK_2_Position004_z0_ch00	12.4716	070215_WT1_FORSK_2_002	20.5287	070215_WT2_FORSK_1_016	17.9852		2015-06-18 aDRG_DLK KO_DMSO_2_Position015_z0_ch00	11.9911	070215_KO1_DMSO_2_018	13.1695	070215_KO2_DMSO_1_013	14.0104		2015-06-18 aDRG_DLK KO_FORSK_1_Position023_z0_ch00	11.9774	070215_KO1_FORSK_2_010	17.5821	070215_KO2_FOSRK_2_015	15.6274
2015-06-18 aDRG_DLK WT_DMSO_2_Position024_z0_ch00	12.2613	070215_WT1_DMSO_1_016	21.6462	070215_WT2_DMSO_2_008	19.9345		2015-06-18 aDRG_DLK WT_FORSK_2_Position013_z0_ch00	12.2513	070215_WT1_FORSK_1_027	19.9172	070215_WT2_FORSK_1_024	17.6877		2015-06-18 aDRG_DLK KO_DMSO_2_Position020_z0_ch00	11.9911	070215_KO1_DMSO_2_009	13.0276	070215_KO2_DMSO_2_012	13.2541		2015-06-18 aDRG_DLK KO_FORSK_2_Position002_z0_ch00	11.901	070215_KO1_FORSK_2_019	17.5776	070215_KO2_FOSRK_2_004	15.6147
2015-06-18 aDRG_DLK WT_DMSO_1_Position009_z0_ch00	11.901	070215_WT1_DMSO_1_010	20.4886	070215_WT2_DMSO_2_010	19.8025		2015-06-18 aDRG_DLK WT_FORSK_1_Position004_z0_ch00	12.1804	070215_WT1_FORSK_2_022	19.2647	070215_WT2_FORSK_2_011	16.5001		2015-06-18 aDRG_DLK KO_DMSO_2_Position010_z0_ch00	11.9356	070215_KO1_DMSO_2_015	12.8237	070215_KO2_DMSO_2_021	13.2541		2015-06-18 aDRG_DLK KO_FORSK_2_Position010_z0_ch00	11.901	070215_KO1_FORSK_2_002	16.8204	070215_KO2_FORSK_1_017	15.5546
2015-06-18 aDRG_DLK WT_DMSO_1_Position011_z0_ch00	11.7636	070215_WT1_DMSO_2_027	20.0964	070215_WT2_DMSO_2_019	19.7852		2015-06-18 aDRG_DLK WT_FORSK_1_Position015_z0_ch00	12.1576	070215_WT1_FORSK_1_007	18.6404	070215_WT2_FORSK_1_005	16.4446		2015-06-18 aDRG_DLK KO_DMSO_1_Position022_z0_ch00	11.6735	070215_KO1_DMSO_1_006	12.4297	070215_KO2_DMSO_1_012	13.084		2015-06-18 aDRG_DLK KO_FORSK_2_Position013_z0_ch00	11.891	070215_KO1_FORSK_2_012	16.4173	070215_KO2_FOSRK_2_004	14.9941
2015-06-18 aDRG_DLK WT_DMSO_2_Position024_z0_ch00	11.5825	070215_WT1_DMSO_1_020	20.0792	070215_WT2_DMSO_1_003	19.6342		2015-06-18 aDRG_DLK WT_FORSK_2_Position016_z0_ch00	11.9911	070215_WT1_FORSK_1_015	18.3702	070215_WT2_FORSK_2_018	16.3809		2015-06-18 aDRG_DLK KO_DMSO_1_Position005_z0_ch00	11.587	070215_KO1_DMSO_2_005	12.3278	070215_KO2_DMSO_1_020	13.0512		2015-06-18 aDRG_DLK KO_FORSK_1_Position016_z0_ch00	11.7636	070215_KO1_FORSK_2_009	16.2035	070215_KO2_FORSK_1_018	14.863
2015-06-18 aDRG_DLK WT_DMSO_1_Position008_z0_ch00	11.4969	070215_WT1_DMSO_1_021	19.7124	070215_WT2_DMSO_2_006	19.4758		2015-06-18 aDRG_DLK WT_FORSK_1_Position012_z0_ch00	11.891	070215_WT1_FORSK_2_003	18.16	070215_WT2_FORSK_1_016	16.3163		2015-06-18 aDRG_DLK KO_DMSO_1_Position019_z0_ch00	11.5306	070215_KO1_DMSO_2_009	12.2613	070215_KO2_DMSO_2_009	13.0512		2015-06-18 aDRG_DLK KO_FORSK_2_Position007_z0_ch00	11.5825	070215_KO1_FORSK_2_009	16.1225	070215_KO2_FORSK_1_010	14.7566
2015-06-18 aDRG_DLK WT_DMSO_1_Position005_z0_ch00	11.335	070215_WT1_DMSO_2_028	19.3967	070215_WT2_DMSO_1_017	19.2283		2015-06-18 aDRG_DLK WT_FORSK_2_Position014_z0_ch00	11.284	070215_WT1_FORSK_2_007	17.6613	070215_WT2_FORSK_1_001	16.2035		2015-06-18 aDRG_DLK KO_DMSO_2_Position002_z0_ch00	11.2704	070215_KO1_DMSO_2_012	12.0684	070215_KO2_DMSO_1_004	13.0321		2015-06-18 aDRG_DLK KO_FORSK_1_Position028_z0_ch00	11.5443	070215_KO1_FORSK_2_015	16.1225	070215_KO2_FORSK_1_010	14.5982
2015-06-18 aDRG_DLK WT_DMSO_1_Position019_z0_ch00	11.335	070215_WT1_DMSO_1_020	19.2511	070215_WT2_DMSO_1_017	19.1564		2015-06-18 aDRG_DLK WT_FORSK_1_Position021_z0_ch00	11.2704	070215_WT1_FORSK_1_003	17.6495	070215_WT2_FORSK_1_006	16.1252		2015-06-18 aDRG_DLK KO_DMSO_2_Position004_z0_ch00	10.9664	070215_KO1_DMSO_1_006	11.9774	070215_KO2_DMSO_1_001	12.8219		2015-06-18 aDRG_DLK KO_FORSK_2_Position021_z0_ch00	11.284	070215_KO1_FORSK_1_022	15.9177	070215_KO2_FORSK_1_012	14.4281
2015-06-18 aDRG_DLK WT_DMSO_2_Position009_z0_ch00	11.0101	070215_WT1_DMSO_1_021	19.1564	070215_WT2_DMSO_1_018	19.0572		2015-06-18 aDRG_DLK WT_FORSK_2_Position008_z0_ch00	11.1575	070215_WT1_FORSK_1_017	17.5676	070215_WT2_FORSK_1_010	15.9104		2015-06-18 aDRG_DLK KO_DMSO_2_Position012_z0_ch00	10.7271	070215_KO1_DMSO_1_022	11.9337	070215_KO2_DMSO_1_016	12.5307		2015-06-18 aDRG_DLK KO_FORSK_2_Position030_z0_ch00	11.2694	070215_KO1_FORSK_1_014	15.875	070215_KO2_FOSRK_2_014	14.338
2015-06-18 aDRG_DLK WT_DMSO_1_Position017_z0_ch00	10.9846	070215_WT1_DMSO_1_019	19.0044	070215_WT2_DMSO_1_018	18.9908		2015-06-18 aDRG_DLK WT_FORSK_2_Position009_z0_ch00	11.122	070215_WT1_FORSK_2_017	17.3601	070215_WT2_FORSK_1_019	15.7457		2015-06-18 aDRG_DLK KO_DMSO_1_Position016_z0_ch00	10.687	070215_KO1_DMSO_2_012	11.891	070215_KO2_DMSO_1_007	12.4807		2015-06-18 aDRG_DLK KO_FORSK_2_Position001_z0_ch00	10.687	070215_KO1_FORSK_2_004	15.834	070215_KO2_FOSRK_2_004	14.0677
2015-06-18 aDRG_DLK WT_DMSO_1_Position004_z0_ch00	10.6124	070215_WT1_DMSO_2_001	18.9089	070215_WT2_DMSO_2_018	18.9116		2015-06-18 aDRG_DLK WT_FORSK_1_Position015_z0_ch00	10.7271	070215_WT1_FORSK_2_016	17.3164	070215_WT2_FORSK_2_007	15.5246		2015-06-18 aDRG_DLK KO_DMSO_2_Position023_z0_ch00	10.4723	070215_KO1_DMSO_2_011	11.7408	070215_KO2_DMSO_1_015	12.3278		2015-06-18 aDRG_DLK KO_FORSK_1_Position003_z0_ch00	10.3767	070215_KO1_FORSK_1_004	15.8103	070215_KO2_FOSRK_2_003	14.0004
2015-06-18 aDRG_DLK WT_DMSO_1_Position008_z0_ch00	10.5751	070215_WT1_DMSO_2_030	18.696	070215_WT2_DMSO_1_018	18.443		2015-06-18 aDRG_DLK WT_FORSK_1_Position013_z0_ch00	10.4668	070215_WT1_FORSK_1_001	16.5602	070215_WT2_FORSK_2_011	15.4436		2015-06-18 aDRG_DLK KO_DMSO_2_Position011_z0_ch00	10.4668	070215_KO1_DMSO_2_008	11.6735	070215_KO2_DMSO_2_017	12.2613		2015-06-18 aDRG_DLK KO_FORSK_2_Position007_z0_ch00	9.9463	070215_KO1_FORSK_2_006	15.4927	070215_KO2_FORSK_1_009	13.8702
2015-06-18 aDRG_DLK WT_DMSO_2_Position019_z0_ch00	10.4668	070215_WT1_DMSO_2_030	18.443	070215_WT2_DMSO_1_007	18.1554		2015-06-18 aDRG_DLK WT_FORSK_2_Position017_z0_ch00	10.3604	070215_WT1_FORSK_1_005	16.5411	070215_WT2_FORSK_1_004	15.4063		2015-06-18 aDRG_DLK KO_DMSO_1_Position001_z0_ch00	10.3604	070215_KO1_DMSO_1_009	11.587	070215_KO2_DMSO_1_019	12.2531		2015-06-18 aDRG_DLK KO_FORSK_1_Position024_z0_ch00	9.68786	070215_KO1_FORSK_1_018	15.4436	070215_KO2_FORSK_1_017	13.8302
2015-06-18 aDRG_DLK WT_DMSO_2_Position024_z0_ch00	10.3367	070215_WT1_DMSO_2_029	17.9907	070215_WT2_DMSO_2_018	18.1281		2015-06-18 aDRG_DLK WT_FORSK_1_Position004_z0_ch00	10.2957	070215_WT1_FORSK_2_019	16.0724	070215_WT2_FORSK_2_004	15.4063		2015-06-18 aDRG_DLK KO_DMSO_1_Position007_z0_ch00	10.3604	070215_KO1_DMSO_1_013	11.5306	070215_KO2_DMSO_2_001	11.7881		2015-06-18 aDRG_DLK KO_FORSK_1_Position029_z0_ch00	9.45035	070215_KO1_FORSK_2_004	15.4436	070215_KO2_FOSRK_2_003	13.8074
2015-06-18 aDRG_DLK WT_DMSO_1_Position005_z0_ch00	10.2957	070215_WT1_DMSO_2_020	17.7223	070215_WT2_DMSO_2_002	17.9852		2015-06-18 aDRG_DLK WT_FORSK_2_Position013_z0_ch00	9.9463	070215_WT1_FORSK_2_021	15.975	070215_WT2_FORSK_1_021	15.1069		2015-06-18 aDRG_DLK KO_DMSO_1_Position014_z0_ch00	9.9463	070215_KO1_DMSO_1_009	11.2694	070215_KO2_DMSO_1_006	11.7636		2015-06-18 aDRG_DLK KO_FORSK_2_Position008_z0_ch00	9.00809	070215_KO1_FORSK_2_016	15.3726	070215_KO2_FOSRK_2_007	13.7401
2015-06-18 aDRG_DLK WT_DMSO_2_Position025_z0_ch00	10.2957	070215_WT1_DMSO_2_011	17.6303	070215_WT2_DMSO_1_006	17.8679		2015-06-18 aDRG_DLK WT_FORSK_2_Position017_z0_ch00	9.9463	070215_WT1_FORSK_1_009	15.8668	070215_WT2_FORSK_2_002	14.8649		2015-06-18 aDRG_DLK KO_DMSO_1_Position004_z0_ch00	9.54044	070215_KO1_DMSO_2_004	11.1329	070215_KO2_DMSO_1_018	11.7408		2015-06-18 aDRG_DLK KO_FORSK_1_Position005_z0_ch00	8.76148	070215_KO1_FORSK_1_011	14.479	070215_KO2_FORSK_1_018	13.7346
2015-06-18 aDRG_DLK WT_DMSO_2_Position022_z0_ch00	10.2066	070215_WT1_DMSO_2_030	17.4092	070215_WT2_DMSO_2_018	17.8679		2015-06-18 aDRG_DLK WT_FORSK_1_Position007_z0_ch00	9.28018	070215_WT1_FORSK_1_018	15.3726	070215_WT2_FORSK_1_003	14.8357		2015-06-18 aDRG_DLK KO_DMSO_2_Position004_z0_ch00	9.54044	070215_KO1_DMSO_2_013	11.1329	070215_KO2_DMSO_1_020	11.6735		2015-06-18 aDRG_DLK KO_FORSK_1_Position002_z0_ch00	8.58767	070215_KO1_FORSK_1_013	13.7401	070215_KO2_FOSRK_2_004	13.7346
2015-06-18 aDRG_DLK WT_DMSO_1_Position006_z0_ch00	10.1001	070215_WT1_DMSO_1_009	17.0097	070215_WT2_DMSO_1_012	17.6877		2015-06-18 aDRG_DLK WT_FORSK_2_Position013_z0_ch00	9.19009	070215_WT1_FORSK_1_022	15.1624	070215_WT2_FORSK_2_018	14.8357		2015-06-18 aDRG_DLK KO_DMSO_1_Position008_z0_ch00	9.19009	070215_KO1_DMSO_1_011	10.9746	070215_KO2_DMSO_1_007	11.5616		2015-06-18 aDRG_DLK KO_FORSK_1_Position021_z0_ch00	8.58767	070215_KO1_FORSK_2_014	13.6582	070215_KO2_FOSRK_2_003	13.6618
2015-06-18 aDRG_DLK WT_DMSO_1_Position008_z0_ch00	9.9463	070215_WT1_DMSO_2_027	16.9105	070215_WT2_DMSO_2_002	17.462		2015-06-18 aDRG_DLK WT_FORSK_2_Position011_z0_ch00	9.1	070215_WT1_FORSK_1_010	15.1069	070215_WT2_FORSK_1_012	14.7566		2015-06-18 aDRG_DLK KO_DMSO_2_Position010_z0_ch00	8.42842	070215_KO1_DMSO_1_012	10.9746	070215_KO2_DMSO_2_003	11.5443		2015-06-18 aDRG_DLK KO_FORSK_2_Position006_z0_ch00	8.39202	070215_KO1_FORSK_2_002	13.5526	070215_KO2_FORSK_1_003	13.6054
2015-06-18 aDRG_DLK WT_DMSO_1_Position014_z0_ch00	9.8007	070215_WT1_DMSO_2_030	16.8113	070215_WT2_DMSO_2_019	17.2263		2015-06-18 aDRG_DLK WT_FORSK_2_Position010_z0_ch00	8.96987	070215_WT1_FORSK_2_009	14.8467	070215_WT2_FORSK_2_025	14.5982		2015-06-18 aDRG_DLK KO_DMSO_2_Position017_z0_ch00	8.18363	070215_KO1_DMSO_1_019	10.8781	070215_KO2_DMSO_1_009	11.3823		2015-06-18 aDRG_DLK KO_FORSK_1_Position006_z0_ch00	8.18181	070215_KO1_FORSK_2_019	13.3816	070215_KO2_FOSRK_2_014	13.5481
2015-06-18 aDRG_DLK WT_DMSO_1_Position010_z0_ch00	9.68786	070215_WT1_DMSO_1_018	16.7913	070215_WT2_DMSO_2_019	16.724		2015-06-18 aDRG_DLK WT_FORSK_1_Position017_z0_ch00	8.70961	070215_WT1_FORSK_2_020	14.5982	070215_WT2_FORSK_2_010	14.338		2015-06-18 aDRG_DLK KO_DMSO_2_Position025_z0_ch00	8.18363	070215_KO1_DMSO_2_014	10.6543	070215_KO2_DMSO_2_022	11.2694		2015-06-18 aDRG_DLK KO_FORSK_1_Position013_z0_ch00	7.51751	070215_KO1_FORSK_2_011	13.3497	070215_KO2_FOSRK_2_016	13.5481
2015-06-18 aDRG_DLK WT_DMSO_1_Position002_z0_ch00	9.28018	070215_WT1_DMSO_1_004	16.6175	070215_WT2_DMSO_2_011	16.7076		2015-06-18 aDRG_DLK WT_FORSK_2_Position004_z0_ch00	8.42842	070215_WT1_FORSK_1_006	14.56	070215_WT2_FORSK_2_030	13.9585		2015-06-18 aDRG_DLK KO_DMSO_2_Position024_z0_ch00	7.83146	070215_KO1_DMSO_2_007	10.4268	070215_KO2_DMSO_2_019	11.1575		2015-06-18 aDRG_DLK KO_FORSK_2_Position028_z0_ch00	7.51751	070215_KO1_FORSK_2_019	13.0194	070215_KO2_FOSRK_2_002	13.3115
2015-06-18 aDRG_DLK WT_DMSO_1_Position017_z0_ch00	9.00809	070215_WT1_DMSO_2_015	16.3982	070215_WT2_DMSO_2_003	16.6885		2015-06-18 aDRG_DLK WT_FORSK_2_Position015_z0_ch00	7.77777	070215_WT1_FORSK_1_011	14.4062	070215_WT2_FORSK_2_016	13.8702		2015-06-18 aDRG_DLK KO_DMSO_1_Position020_z0_ch00	7.35098	070215_KO1_DMSO_2_004	10.3367	070215_KO2_DMSO_2_014	10.7271		2015-06-18 aDRG_DLK KO_FORSK_1_Position009_z0_ch00	6.58476	070215_KO1_FORSK_2_007	12.9511	070215_KO2_FOSRK_2_007	13.2924
2015-06-18 aDRG_DLK WT_DMSO_1_Position019_z0_ch00	9.00809	070215_WT1_DMSO_1_020	16.3108	070215_WT2_DMSO_1_016	16.5602		2015-06-18 aDRG_DLK WT_FORSK_1_Position021_z0_ch00	7.51751	070215_WT1_FORSK_2_020	13.7401	070215_WT2_FORSK_2_017	13.7173		2015-06-18 aDRG_DLK KO_DMSO_1_Position021_z0_ch00	7.18263	070215_KO1_DMSO_1_008	10.2066	070215_KO2_DMSO_2_013	10.687		2015-06-18 aDRG_DLK KO_FORSK_1_Position028_z0_ch00	6.58476	070215_KO1_FORSK_1_014	12.6572	070215_KO2_FORSK_1_009	13.2341
2015-06-18 aDRG_DLK WT_DMSO_2_Position025_z0_ch00	8.58767	070215_WT1_DMSO_1_020	15.975	070215_WT2_DMSO_1_011	16.4883		2015-06-18 aDRG_DLK WT_FORSK_2_Position017_z0_ch00	6.51742	070215_WT1_FORSK_1_025	13.6982	070215_WT2_FORSK_2_021	13.6081		2015-06-18 aDRG_DLK KO_DMSO_1_Position021_z0_ch00	6.79952	070215_KO1_DMSO_1_016	10.2066	070215_KO2_DMSO_1_001	10.212		2015-06-18 aDRG_DLK KO_FORSK_2_Position025_z0_ch00	6.58476	070215_KO1_FORSK_1_011	12.5307	070215_KO2_FORSK_1_016	13.2278
2015-06-18 aDRG_DLK WT_DMSO_1_Position009_z0_ch00	8.54035	070215_WT1_DMSO_2_017	15.975	070215_WT2_DMSO_2_014	16.34		2015-06-18 aDRG_DLK WT_FORSK_1_Position003_z0_ch00	6.48193	070215_WT1_FORSK_2_028	13.4016	070215_WT2_FORSK_2_008	13.5199		2015-06-18 aDRG_DLK KO_DMSO_2_Position003_z0_ch00	6.62935	070215_KO1_DMSO_1_013	9.9463	070215_KO2_DMSO_1_003	9.45035		2015-06-18 aDRG_DLK KO_FORSK_1_Position013_z0_ch00	5.46	070215_KO1_FORSK_2_003	12.4297	070215_KO2_FORSK_1_018	13.2278
2015-06-18 aDRG_DLK WT_DMSO_2_Position023_z0_ch00	7.83146	070215_WT1_DMSO_2_006	15.7749	070215_WT2_DMSO_1_019	16.0579		2015-06-18 aDRG_DLK WT_FORSK_1_Position018_z0_ch00	5.88952	070215_WT1_FORSK_1_015	12.6763	070215_WT2_FORSK_2_027	13.4571		2015-06-18 aDRG_DLK KO_DMSO_1_Position024_z0_ch00	6.58476	070215_KO1_DMSO_1_010	9.78796	070215_KO2_DMSO_1_018	9.45035		2015-06-18 aDRG_DLK KO_FORSK_2_Position026_z0_ch00	5.30621	070215_KO1_FORSK_2_006	12.0675	070215_KO2_FORSK_1_016	12.942
2015-06-18 aDRG_DLK WT_DMSO_2_Position011_z0_ch00	7.63035	070215_WT1_DMSO_2_030	15.773	070215_WT2_DMSO_1_018	15.6147		2015-06-18 aDRG_DLK WT_FORSK_2_Position017_z0_ch00	2.57348	070215_WT1_FORSK_1_025	12.5134	070215_WT2_FORSK_1_016	13.3115		2015-06-18 aDRG_DLK KO_DMSO_2_Position010_z0_ch00	5.82673	070215_KO1_DMSO_2_001	9.54044	070215_KO2_DMSO_2_008	9.37573		2015-06-18 aDRG_DLK KO_FORSK_2_Position015_z0_ch00	4.64009	070215_KO1_FORSK_1_008	12.0247	070215_KO2_FOSRK_2_008	12.9202
2015-06-18 aDRG_DLK WT_DMSO_1_Position004_z0_ch00	7.28	070215_WT1_DMSO_1_006	15.6829	070215_WT2_DMSO_1_018	15.5128				070215_WT1_FORSK_1_011	12.457	070215_WT2_FORSK_2_024	13.2541		2015-06-18 aDRG_DLK KO_DMSO_2_Position014_z0_ch00	5.82673	070215_KO1_DMSO_1_014	9.19009	070215_KO2_DMSO_1_006	9.10819		2015-06-18 aDRG_DLK KO_FORSK_2_Position021_z0_ch00	4.55	070215_KO1_FORSK_1_012	12.0102	070215_KO2_FOSRK_2_009	12.8301
2015-06-18 aDRG_DLK WT_DMSO_1_Position018_z0_ch00	6.92146	070215_WT1_DMSO_2_014	15.237	070215_WT2_DMSO_1_018	15.4281				070215_WT1_FORSK_1_025	12.4115	070215_WT2_FORSK_1_005	12.3278		2015-06-18 aDRG_DLK KO_DMSO_2_Position003_z0_ch00	4.90035	070215_KO1_DMSO_1_024	9.19009	070215_KO2_DMSO_2_009	9.1		2015-06-18 aDRG_DLK KO_FORSK_2_Position011_z0_ch00	3.75193	070215_KO1_FORSK_1_008	11.7636	070215_KO2_FORSK_1_009	12.4716
2015-06-18 aDRG_DLK WT_DMSO_2_Position016_z0_ch00	5.78669	070215_WT1_DMSO_2_012	15.2152	070215_WT2_DMSO_1_019	15.2525				070215_WT1_FORSK_2_009	12.2704	070215_WT2_FORSK_2_013	12.2531		2015-06-18 aDRG_DLK KO_DMSO_2_Position021_z0_ch00	4.06952	070215_KO1_DMSO_1_001	9.1	070215_KO2_DMSO_2_018	9.00809		2015-06-18 aDRG_DLK KO_FORSK_2_Position024_z0_ch00	2.57348	070215_KO1_FORSK_2_006	11.7636	070215_KO2_FOSRK_2_013	12.4615
2015-06-18 aDRG_DLK WT_DMSO_1_Position019_z0_ch00	5.67476	070215_WT1_DMSO_1_020	15.0004	070215_WT2_DMSO_2_019	15.1442				070215_WT1_FORSK_1_016	12.1576	070215_WT2_FORSK_2_018	12.1576		2015-06-18 aDRG_DLK KO_DMSO_1_Position023_z0_ch00	3.64	070215_KO1_DMSO_1_001	7.51751	070215_KO2_DMSO_2_008	8.39202		2015-06-18 aDRG_DLK KO_FORSK_1_Position015_z0_ch00	2.03476	070215_KO1_FORSK_1_008	11.6735	070215_KO2_FORSK_1_004	12.0247
2015-06-18 aDRG_DLK WT_DMSO_2_Position025_z0_ch00	5.30621	070215_WT1_DMSO_2_008	14.4062	070215_WT2_DMSO_1_018	15.1251				070215_WT1_FORSK_2_003	11.9419	070215_WT2_FORSK_1_005	11.8236		2015-06-18 aDRG_DLK KO_DMSO_1_Position003_z0_ch00	3.28146	070215_KO1_DMSO_1_010	7.51751	070215_KO2_DMSO_1_019	8.28009		2015-06-18 aDRG_DLK KO_FORSK_1_Position016_z0_ch00	0.91	070215_KO1_FORSK_2_007	11.6535	070215_KO2_FORSK_1_005	11.9201
2015-06-18 aDRG_DLK WT_DMSO_1_Position013_z0_ch00	4.55	070215_WT1_DMSO_1_008	14.3507	070215_WT2_DMSO_2_008	14.8521				070215_WT1_FORSK_1_015	11.3495	070215_WT2_FORSK_2_023	11.7408				070215_KO1_DMSO_1_012	6.64391	070215_KO2_DMSO_2_010	7.63035		2015-06-18 aDRG_DLK KO_FORSK_1_Position018_z0_ch00	0.91	070215_KO1_FORSK_2_020	11.122	070215_KO2_FOSRK_2_016	11.7408
2015-06-18 aDRG_DLK WT_DMSO_2_Position024_z0_ch00	4.55	070215_WT1_DMSO_2_030	14.2561	070215_WT2_DMSO_2_017	14.5982				070215_WT1_FORSK_1_008	10.4541	070215_WT2_FORSK_1_001	11.5306				070215_KO1_DMSO_1_011	5.82673	070215_KO2_DMSO_1_009	5.78669				070215_KO1_FORSK_1_010	10.9746	070215_KO2_FOSRK_2_004	11.4178
2015-06-18 aDRG_DLK WT_DMSO_1_Position019_z0_ch00	3.75193	070215_WT1_DMSO_1_020	14.156	070215_WT2_DMSO_1_006	14.4362				070215_WT1_FORSK_2_016	10.3767	070215_WT2_FORSK_1_007	11.4851				070215_KO1_DMSO_2_017	5.78669	070215_KO2_DMSO_2_020	5.78669				070215_KO1_FORSK_1_021	10.4668	070215_KO2_FORSK_1_006	11.284
2015-06-18 aDRG_DLK WT_DMSO_1_Position007_z0_ch00	3.28146	070215_WT1_DMSO_2_030	14.0904	070215_WT2_DMSO_1_005	14.3507				070215_WT1_FORSK_2_008	10.3604	070215_WT2_FORSK_2_024	11.284				070215_KO1_DMSO_1_010	4.64009	070215_KO2_DMSO_1_020	4.64009				070215_KO1_FORSK_2_003	10.4668	070215_KO2_FORSK_1_011	11.2694
2015-06-18 aDRG_DLK WT_DMSO_2_Position009_z0_ch00	3.28146	070215_WT1_DMSO_1_019	13.8702	070215_WT2_DMSO_1_008	14.0904				070215_WT1_FORSK_1_024	10.3367	070215_WT2_FORSK_1_005	11.1957				070215_KO1_DMSO_2_009	3.64	070215_KO2_DMSO_1_012	4.55				070215_KO1_FORSK_2_006	10.4668	070215_KO2_FORSK_1_004	11.2267
2015-06-18 aDRG_DLK WT_DMSO_2_Position025_z0_ch00	3.28146	070215_WT1_DMSO_2_030	13.8302	070215_WT2_DMSO_1_018	14.0158				070215_WT1_FORSK_1_012	10.212	070215_WT2_FORSK_1_005	11.1329				070215_KO1_DMSO_1_007	0.91	070215_KO2_DMSO_2_009	4.06952				070215_KO1_FORSK_2_017	10.3958	070215_KO2_FOSRK_2_014	11.1575
2015-06-18 aDRG_DLK WT_DMSO_1_Position007_z0_ch00	1.28674	070215_WT1_DMSO_2_021	13.8074	070215_WT2_DMSO_1_016	13.7401				070215_WT1_FORSK_1_022	10.2066	070215_WT2_FORSK_1_025	10.4668											070215_KO1_FORSK_1_019	10.3604	070215_KO2_FOSRK_2_001	11.1147
		070215_WT1_DMSO_2_027	13.61	070215_WT2_DMSO_1_011	13.4016				070215_WT1_FORSK_2_006	9.9463	070215_WT2_FORSK_1_018	10.3767											070215_KO1_FORSK_1_019	10.2066	070215_KO2_FORSK_1_017	10.9746
		070215_WT1_DMSO_2_020	13.5199	070215_WT2_DMSO_1_001	13.2596				070215_WT1_FORSK_1_005	9.8007	070215_WT2_FORSK_1_006	10.3604											070215_KO1_FORSK_1_008	9.85621	070215_KO2_FORSK_1_005	10.4668
		070215_WT1_DMSO_2_021	13.5199	070215_WT2_DMSO_2_019	13.2278				070215_WT1_FORSK_1_028	9.8007	070215_WT2_FORSK_1_006	10.2066											070215_KO1_FORSK_2_011	9.68786	070215_KO2_FOSRK_2_001	10.4541
		070215_WT1_DMSO_2_029	13.4016	070215_WT2_DMSO_2_003	13.1777				070215_WT1_FORSK_2_029	9.54044	070215_WT2_FORSK_1_005	9.85621											070215_KO1_FORSK_1_010	9.45035	070215_KO2_FORSK_1_015	10.2957
		070215_WT1_DMSO_2_029	13.1804	070215_WT2_DMSO_2_019	13.1377				070215_WT1_FORSK_2_011	9.45035	070215_WT2_FORSK_2_015	9.68786											070215_KO1_FORSK_1_016	9.45035	070215_KO2_FORSK_1_004	10.2066
		070215_WT1_DMSO_1_009	13.1413	070215_WT2_DMSO_1_012	12.8692				070215_WT1_FORSK_1_025	9.19009	070215_WT2_FORSK_1_006	9.54044											070215_KO1_FORSK_2_017	9.19009	070215_KO2_FOSRK_2_001	10.2066
		070215_WT1_DMSO_1_020	12.679	070215_WT2_DMSO_1_013	12.7336				070215_WT1_FORSK_2_017	9.19009	070215_WT2_FORSK_2_033	9.45035											070215_KO1_FORSK_1_004	9.16734	070215_KO2_FOSRK_2_015	9.85621
		070215_WT1_DMSO_2_026	12.4716	070215_WT2_DMSO_2_004	12.4716				070215_WT1_FORSK_1_028	9.00809	070215_WT2_FORSK_1_015	9.10819											070215_KO1_FORSK_1_016	9.00809	070215_KO2_FOSRK_2_001	9.19009
		070215_WT1_DMSO_1_013	12.457	070215_WT2_DMSO_1_018	12.3278				070215_WT1_FORSK_2_004	9.00809	070215_WT2_FORSK_2_025	9.00809											070215_KO1_FORSK_2_003	8.70961	070215_KO2_FORSK_1_013	8.76148
		070215_WT1_DMSO_2_025	12.4179	070215_WT2_DMSO_1_015	11.7818				070215_WT1_FORSK_2_017	8.70961	070215_WT2_FORSK_1_016	8.54035											070215_KO1_FORSK_2_003	8.70415	070215_KO2_FOSRK_2_011	7.77777
		070215_WT1_DMSO_2_003	12.2713	070215_WT2_DMSO_1_009	11.2694				070215_WT1_FORSK_2_028	8.28009													070215_KO1_FORSK_2_005	8.61952	070215_KO2_FORSK_1_008	7.35098
		070215_WT1_DMSO_2_018	12.2613	070215_WT2_DMSO_1_015	10.92				070215_WT1_FORSK_1_015	7.92155													070215_KO1_FORSK_1_006	8.58767	070215_KO2_FORSK_1_010	6.58476
		070215_WT1_DMSO_1_016	11.891	070215_WT2_DMSO_2_015	10.7444				070215_WT1_FORSK_2_009	7.92155													070215_KO1_FORSK_1_004	8.42842	070215_KO2_FORSK_1_018	5.82673
		070215_WT1_DMSO_2_019	11.8218	070215_WT2_DMSO_2_018	10.7271				070215_WT1_FORSK_2_027	7.51751													070215_KO1_FORSK_1_012	7.92155	070215_KO2_FOSRK_2_004	5.82673
		070215_WT1_DMSO_1_003	11.4851	070215_WT2_DMSO_2_019	10.687				070215_WT1_FORSK_1_025	7.35098													070215_KO1_FORSK_2_008	7.83146	070215_KO2_FORSK_1_003	5.30621
		070215_WT1_DMSO_2_021	11.284	070215_WT2_DMSO_1_019	10.6124				070215_WT1_FORSK_2_005	6.58476													070215_KO1_FORSK_1_002	7.18263	070215_KO2_FOSRK_2_002	4.06952
		070215_WT1_DMSO_1_021	11.2249	070215_WT2_DMSO_2_008	10.6124				070215_WT1_FORSK_1_002	5.82673													070215_KO1_FORSK_2_020	6.58476	070215_KO2_FOSRK_2_001	2.03476
		070215_WT1_DMSO_2_021	11.1329	070215_WT2_DMSO_2_019	10.6124				070215_WT1_FORSK_2_017	5.78669													070215_KO1_FORSK_1_013	5.88952	070215_KO2_FORSK_1_001	1.82
		070215_WT1_DMSO_2_030	11.122	070215_WT2_DMSO_2_014	10.4723				070215_WT1_FORSK_1_020	3.64													070215_KO1_FORSK_1_012	3.64	070215_KO2_FORSK_1_004	1.28674
		070215_WT1_DMSO_2_002	11.0046	070215_WT2_DMSO_1_018	10.4668				070215_WT1_FORSK_1_027	2.03476													070215_KO1_FORSK_2_012	2.03476	070215_KO2_FOSRK_2_005	1.28674
		070215_WT1_DMSO_2_027	10.9846	070215_WT2_DMSO_1_018	10.4668
		070215_WT1_DMSO_2_030	10.7444	070215_WT2_DMSO_2_018	10.2066
		070215_WT1_DMSO_2_029	10.7271	070215_WT2_DMSO_2_019	10.2066
		070215_WT1_DMSO_1_001	10.4541	070215_WT2_DMSO_2_019	10.01
		070215_WT1_DMSO_1_014	10.2066	070215_WT2_DMSO_2_001	9.78796
		070215_WT1_DMSO_1_020	10.1219	070215_WT2_DMSO_2_019	9.78796
		070215_WT1_DMSO_2_022	9.89625	070215_WT2_DMSO_2_005	9.68786
		070215_WT1_DMSO_2_030	9.68786	070215_WT2_DMSO_1_020	9.54044
		070215_WT1_DMSO_2_030	9.54044	070215_WT2_DMSO_1_017	9.45035
		070215_WT1_DMSO_2_030	9.54044	070215_WT2_DMSO_1_016	9.28018
		070215_WT1_DMSO_1_012	9.45035	070215_WT2_DMSO_2_017	9.28018
		070215_WT1_DMSO_1_007	9.19009	070215_WT2_DMSO_2_012	9.19009
		070215_WT1_DMSO_1_005	9.05814	070215_WT2_DMSO_1_016	8.70415
		070215_WT1_DMSO_1_020	9.00809	070215_WT2_DMSO_1_016	8.65228
		070215_WT1_DMSO_1_017	8.8998	070215_WT2_DMSO_1_010	8.61952
		070215_WT1_DMSO_1_019	8.70961	070215_WT2_DMSO_2_007	8.19
		070215_WT1_DMSO_1_020	8.70961	070215_WT2_DMSO_2_019	8.02529
		070215_WT1_DMSO_2_029	8.65228	070215_WT2_DMSO_2_018	7.83146
		070215_WT1_DMSO_2_010	8.58767	070215_WT2_DMSO_2_005	6.51742
		070215_WT1_DMSO_1_016	8.18363	070215_WT2_DMSO_2_013	5.82673
		070215_WT1_DMSO_1_021	8.18181	070215_WT2_DMSO_2_019	5.46
		070215_WT1_DMSO_1_020	7.35098	070215_WT2_DMSO_1_009	4.64009
		070215_WT1_DMSO_1_020	7.35098	070215_WT2_DMSO_1_014	2.87742
		070215_WT1_DMSO_2_009	7.35098	070215_WT2_DMSO_1_016	2.03476
		070215_WT1_DMSO_2_008	6.62935	070215_WT2_DMSO_1_018	2.03476
		070215_WT1_DMSO_1_020	4.55	070215_WT2_DMSO_1_018	1.28674
		070215_WT1_DMSO_2_030	4.55
		070215_WT1_DMSO_2_029	1.82
